# Supplementary material for: OpenProt 2021: deeper functional annotation of the coding potential of eukaryotic genomes
Source: PubMed Central journal article supplement (PMC7779043; doi:10.1093/nar/gkaa1036), 2020-11-12
Supplement: gkaa1036_supplemental_file.pdf [file gkaa1036_supplemental_file.pdf]

## Supplementary Materials

\*\*\*\*\*

TABLE OF CONTENT (*click to get to the desired item*)

[Supplementary S1](#): Summary of the methods behind all OpenProt features presented in the initial release.

[Supplementary S2](#): Distribution of candidate ORF-pvalue based on the overlap with the ORF predicted by OpenProt.

[Supplementary S3](#): General statistics per species for OpenProt v1.6.

[Supplementary S4](#): List of mass spectrometry and ribosome profiling studies incorporated in OpenProt v1.6.

[Supplementary S5](#): Getting started tutorials for OpenProt v1.6.

\*\*\*\*\*

## **Supplementary S1**

*Summary of the methods behind all OpenProt features presented in the initial release.*

OpenProt is the first proteogenomic resource that supports a polycistronic annotation model of eukaryotic genomes. The database predicts all open reading frames (ORFs) from an exhaustive transcriptome, and categorizes all predicted ORFs as Reference proteins (RefProts - known proteins), Novel Isoforms (novel proteins with a sequence similarity with a known protein from the same gene) and Alternative proteins (AltProts - novel proteins with no sequence similarity with a known protein from the same gene). OpenProt then cumulates *in silico* and experimental evidence of expression for all predicted ORFs.

The OpenProt resource was first released in January 2019. A summary of the methods described in details in the initial release (24) is provided below. Similarly, tutorials for the web features ([genome browser](#), [search page](#), [downloads](#) and [data submission](#) platforms) are presented in [supplementary S5](#).

### **Open Reading Frames (ORFs) prediction**

OpenProt retrieves an exhaustive transcriptome by combining two well-used annotations (NCBI RefSeq and Ensembl), and predicts ORFs from a 3-frames *in silico* translation using EMBOSS Transeq. All possible ORFs with an ATG initiating codon and a minimal length of 30 codons are annotated and constitutes the OpenProt ORFeome. For each ORF, the source annotation (NCBI RefSeq or Ensembl) is associated to allow users to filter predictions by annotation if desired.

### **ORF product classification: RefProts, Novel Isoforms, and AltProts**

The OpenProt ORFeome is then filtered using NCBI RefSeq, Ensembl and UniProt protein entries to identify annotated proteins, called RefProts. The identified RefProts are then associated the accession number from NCBI RefSeq, Ensembl and/or UniProt.

Once known ORFs are filtered out (RefProt category), only currently unannotated ORFs remain. All predicted proteins from the same gene of a RefProt are filtered as follows: (a) over 80 % of protein sequence identity with the RefProt over 50% of the length using Basic Local Alignment Search Tool (BLAST); (b) identical genomic coordinates of start or end codon with a sequence identity (EMBOSS Matcher PAM10 matrix score  $\leq 100$ ) over 20% of the length of the RefProt. If one of these two condition is met, the novel predicted protein is categorized as a Novel Isoform. The accession number of Novel Isoforms start with II\_.

The remaining predicted proteins correspond to AltProts: novel proteins with no sequence similarity with a RefProt from the same gene. The accession number of AltProts start with IP\_.

All predictions for each species are present on the OpenProt website and can be downloaded, queried or visualized using the Genome Browser. Comprehensive tutorials for all three platforms is provided in [supplementary S5](#) and under the [Help section of the OpenProt website](#).

### **Mass spectrometry data analysis pipeline**

OpenProt re-analyzes mass spectrometry (MS) datasets to gather evidence of expression for all proteins annotated in the database. MS datasets are downloaded from ProteomeXchange and the PRIDE archive. All datasets are re-analyzed using the OpenProt protein FASTA containing all RefProts, AltProts and Isoforms. The MS pipeline uses PeptideShaker software configured to run 4 search engines on mgf MS files (X!Tandem, MS-GF+, Comet and OMSSA) via SearchGUI. The SearchGUI general parameters are set as described in the original studies. To account for the increase of the search space when using such a large database as OpenProt, the FDR is set at 0.001%. Furthermore, peptide assignment rules are enforced such that a predicted protein (AltProt or Isoform) can only be identified with a unique peptide. When a peptide matches a novel predicted protein and a RefProt, it is assigned to the RefProt only.

The identification results from MS analyses are implemented to the OpenProt database and can be downloaded or queried from the Genome Browser or the Search page. More information on the MS pipeline can be found on the OpenProt [Help page](#).

#### Ribosome profiling data analysis pipeline

OpenProt re-analyzes ribosome profiling (Ribo-seq) datasets to gather evidence of translation for all ORFs annotated in the database. Ribo-seq datasets are downloaded from the Gene Omnibus platform. The raw data are re-analyzed using the PRICE workflow. PRICE is run with default parameters, except for the FDR set at 1 % (instead of 10%) using the rescue mode, and fed with both NCBI RefSeq and Ensembl annotations (run separately). Briefly, reads mapping to ribosomal RNAs are filtered out and remaining footprints are mapped onto the genome and transcriptome with up to three mismatches. Multi-mapped reads are fractionated across all possible sites unless uniquely mapped reads to nearby loci allow confident identification of the footprint coordinates. PRICE reconstitutes the set of codons most likely to yield the observed reads, creating a list of ORF candidates. These are filtered according to a stringent 1% FDR (usually set at 10%) to focus on highly confident translation events.

The identification results from Ribo-seq analyses are implemented to the OpenProt database and can be downloaded or queried from the Search page. More information on the pipeline can be found on the OpenProt [Help page](#).

#### Conservation analysis pipeline

OpenProt gathers evidence of conservation for all proteins annotated in the database. OpenProt computes orthology relationships from the 10 currently supported species. The homology of protein sequences is evaluated using an InParanoid-like approach and separates orthologs (homologous sequences from different species) from paralogs (homologous sequences from the same species but different genes). Orthologs are identified using an all-vs-all BLAST, i.e. all protein sequences from one species are searched against all protein sequences from another species. Similarly, all protein sequences from one species are searched against all protein sequences from a different gene of the same species to identify paralogs. Orthology relationships are called for a bit-score over 40 and an overlap over 50 % of the queried sequence.

All identified orthology relationships are then implemented to the OpenProt database and can be downloaded or queried from the Search page. More information can be found on the OpenProt [Help page](#).

#### Protein functional domain prediction

All proteins annotated on OpenProt are scanned for the presence of known functional domains using InterProScan with the default parameters. Domain predictions as well as gene ontology (GO) and pathway annotations are reported if significant (e-value < 10<sup>-3</sup>).

The results are inserted into the OpenProt database and can be downloaded or queried from the Search page. More information are available on the OpenProt [Help page](#).

### Applications and Downloads

In addition to a genome Browser and an advanced query page, [OpenProt website](#) contains a Downloads platform. This platform allows customizable downloads of all data present on OpenProt for every release.

For example, one can select only the most confident protein predictions (previously unannotated proteins detected with at least two unique peptides in mass spectrometry experiments), or all predicted proteins. Personalized database generation and download based on custom RNA-seq results is supported, as detailed in the [Help page](#) and a stand-alone script is available in the Related Scripts section of the [About page](#).

The results table from specific queries made on the search page can be shared or downloaded as a TSV or a protein FASTA file (detailed in the [Help page](#)).

Overall, OpenProt allows (1) [advanced search](#) and download of results table, (2) [genome browsing](#) with visualization of MS evidence, and (3) [personalized downloads](#) (data and file format) for any research endeavour.

[Back to the table of contents](#)

## Supplementary S2

### *Distribution of candidate ORF-pvalue based on the overlap with the ORF predicted by OpenProt*

The PRICE algorithm associates a p-value to each ORF candidate. This p-value is the result of a generalized binomial test and as such relates to the confidence of the given ORF to not be attributable to noise. This was evaluated through all studies on OpenProt, but only the study with the top (lowest p-values, panel A) and bottom (highest p-values, panel B) results are presented.

- A. From the study [GSE64962](#) in human fibroblasts, the distribution of p-values of the ORF candidates from the PRICE algorithm are observed based on their minimal overlap with the corresponding ORF predicted by OpenProt. All codons are considered possible initiation sites here. The boxplot corresponds to the median and 5-95 % confidence interval. Please note the graph y axis is from  $10^{-24}$  to  $10^0$ .

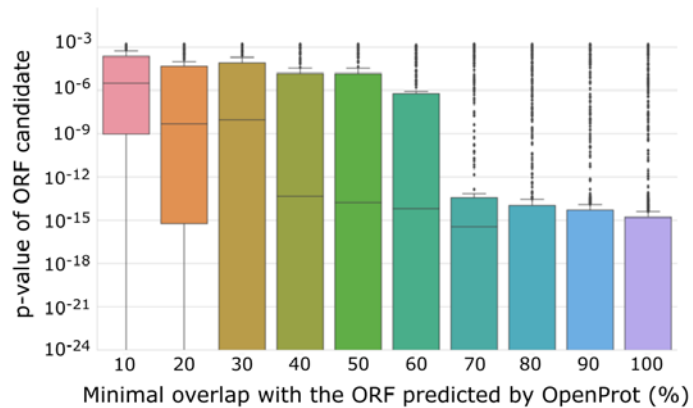

- B. From the study [GSE41605](#) in human fibroblasts, the distribution of p-values of the ORF candidates from the PRICE algorithm are observed based on their minimal overlap with the corresponding ORF predicted by OpenProt. All codons are considered possible initiation sites here. The boxplot corresponds to the median and 5-95 % confidence interval. Please note the graph y axis is from  $10^{-24}$  to  $10^0$ .

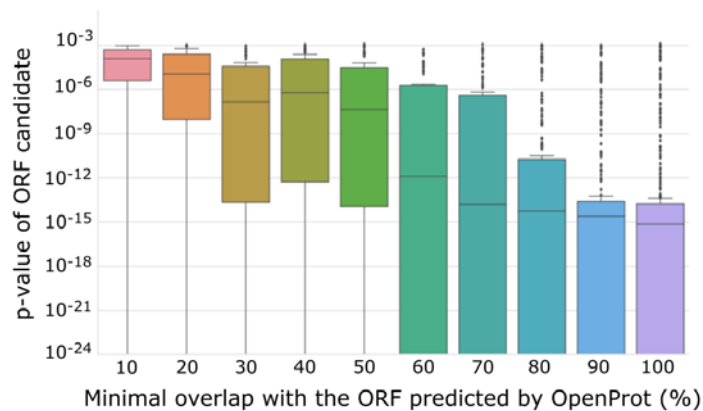

[Back to the table of contents](#)

## Supplementary S3

### General statistics per species for OpenProt v1.6

Here are the summary statistics for all species supported in OpenProt v1.6: [Homo sapiens](#), [Pan troglodytes](#), [Mus musculus](#), [Rattus norvegicus](#), [Bos taurus](#), [Ovis aries](#), [Danio rerio](#), [Drosophila melanogaster](#), [Caenorhabditis elegans](#) and [Saccharomyces cerevisiae](#).

Legend for the pie charts: ncRNA = non-coding RNA; UTR = untranslated region of an mRNA; MS = mass spectrometry; TE = translation evidence from Ribo-seq.

#### \*\*\* OpenProt v1.6 general statistics in *Homo sapiens* \*\*\*

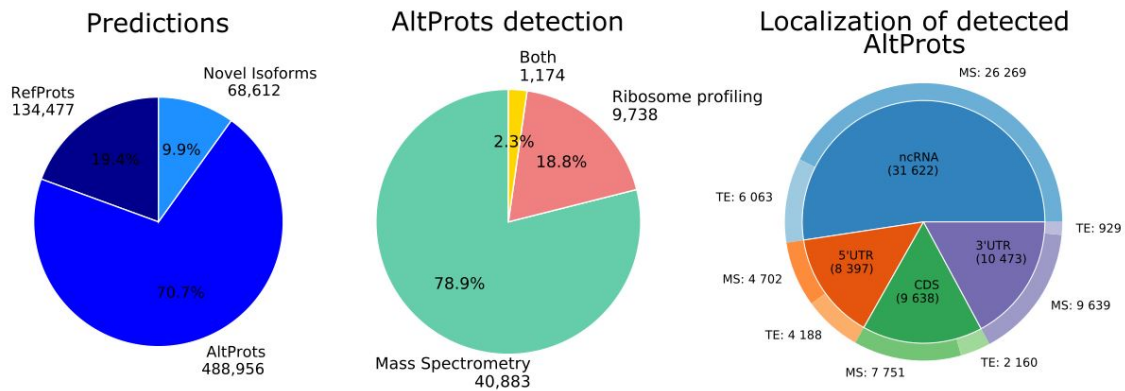

#### \*\*\* OpenProt v1.6 general statistics in *Pan troglodytes* \*\*\*

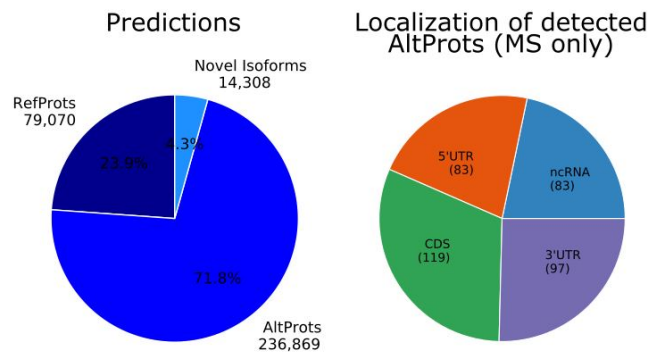

Please note that no ribosome profiling data was available for *Pan troglodytes*.

\*\*\* OpenProt v1.6 general statistics in *Mus musculus* \*\*\*

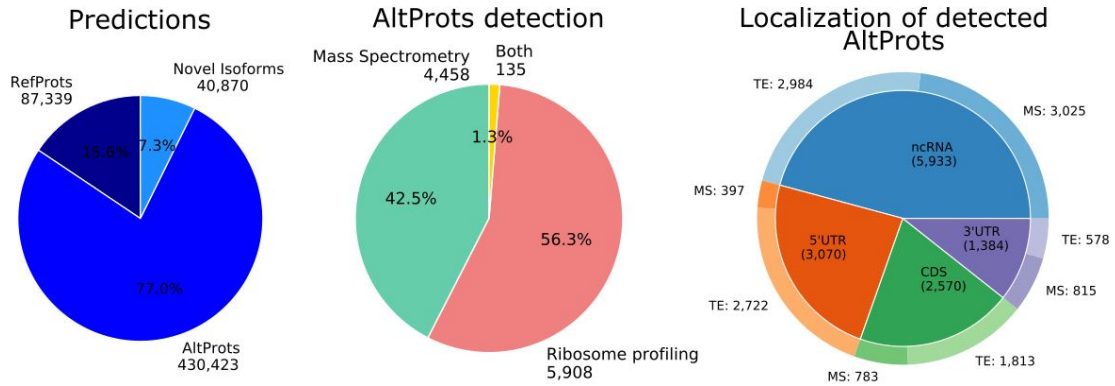

\*\*\* OpenProt v1.6 general statistics in *Rattus norvegicus* \*\*\*

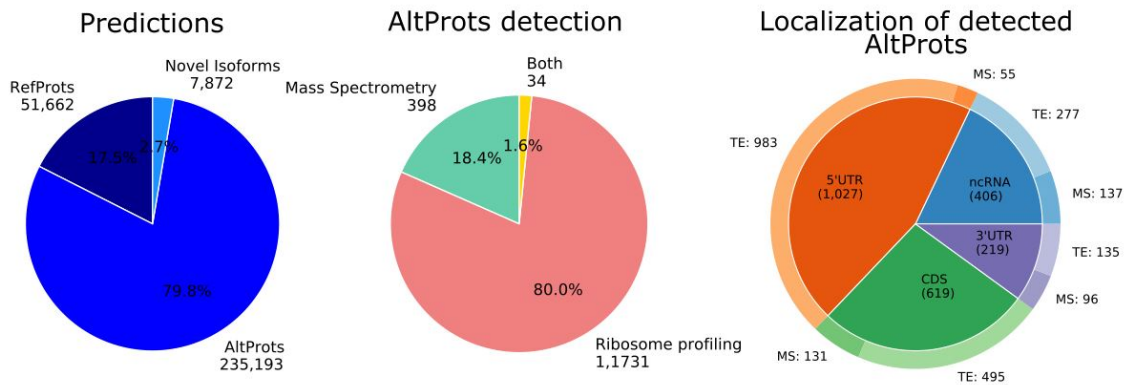

\*\*\* OpenProt v1.6 general statistics in *Bos taurus* \*\*\*

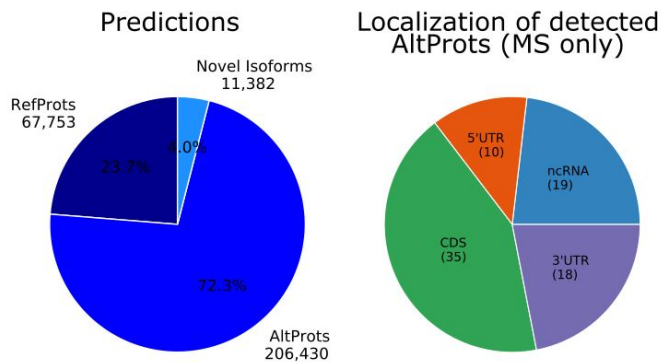

Please note that no ribosome profiling data was available for *Bos taurus*.

\*\*\* OpenProt v1.6 general statistics in *Ovis aries* \*\*\*

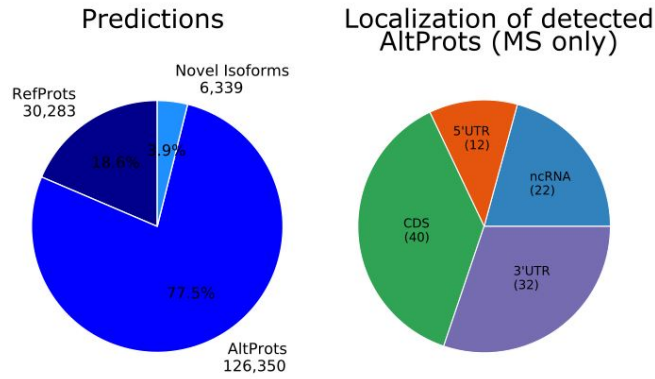

Please note that no ribosome profiling data was available for *Ovis aries*.

\*\*\* OpenProt v1.6 general statistics in *Danio rerio* \*\*\*

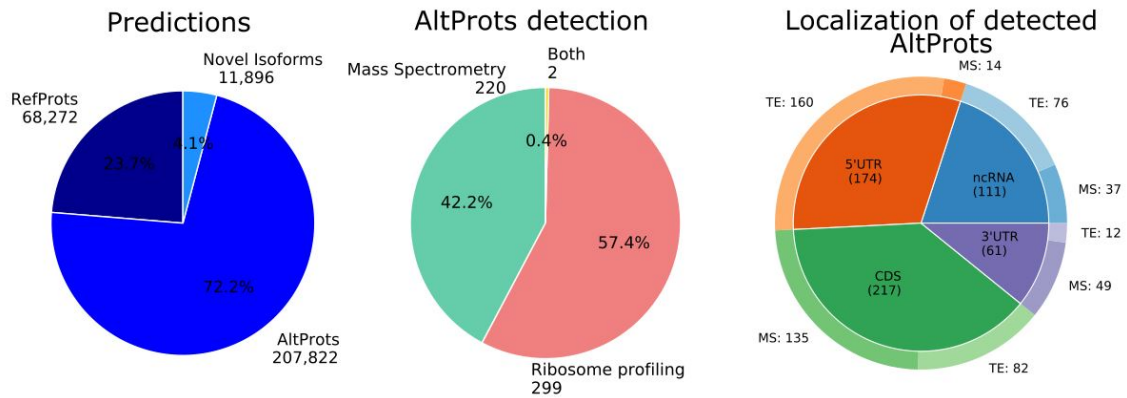



\*\*\* OpenProt v1.6 general statistics in *Drosophila melanogaster* \*\*\*

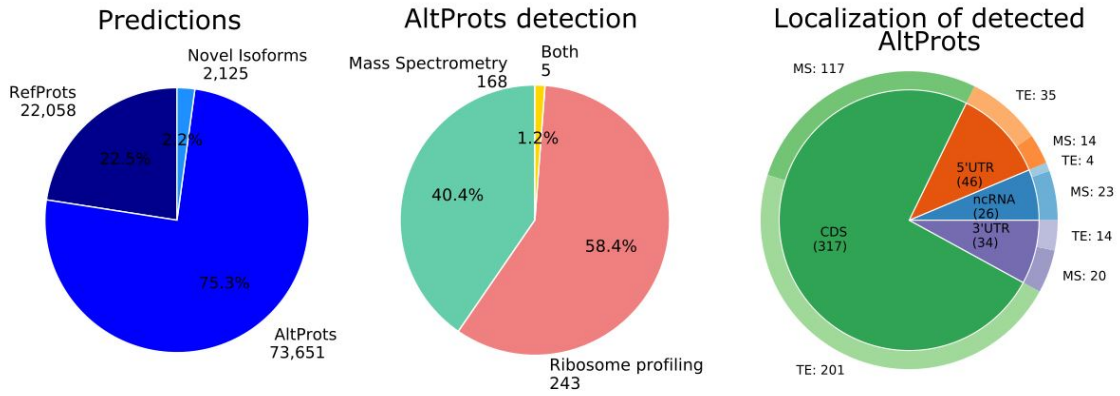

\*\*\* OpenProt v1.6 general statistics in *Caenorhabditis elegans* \*\*\*

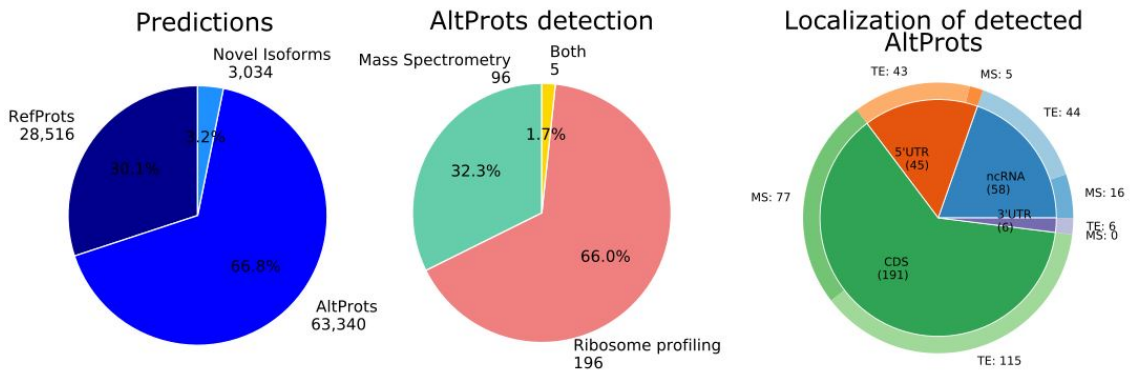

\*\*\* OpenProt v1.6 general statistics in *Saccharomyces cerevisiae S288c* \*\*\*

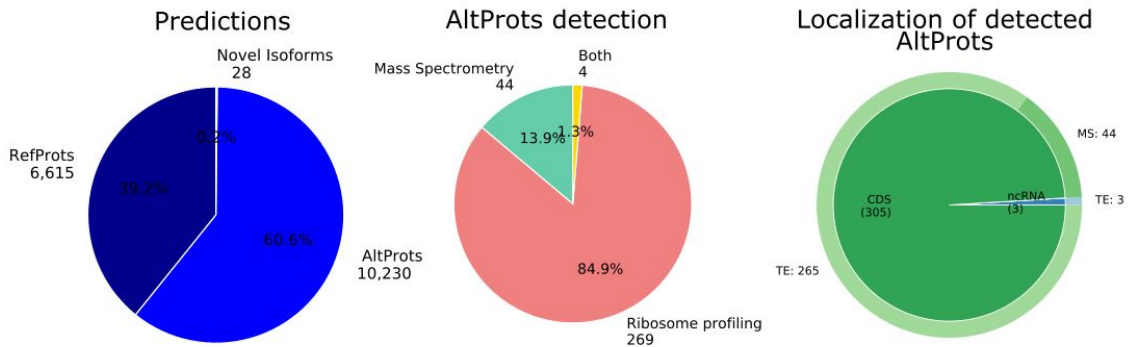

[Back to the table of contents](#)

## Supplementary S4

*List of [mass spectrometry](#) and [ribosome profiling](#) studies incorporated in OpenProt v1.6*

List of the 177 **mass spectrometry** datasets incorporated in OpenProt v1.6 with the associated species and citation (PMID accession).

| Species                  | Study ID     | Data source                                                                                                                                                 | PMID     |
|--------------------------|--------------|-------------------------------------------------------------------------------------------------------------------------------------------------------------|----------|
| Saccharomyces cerevisiae | PXD000375    | <a href="https://www.ebi.ac.uk/pride/archive/projects/PXD000375">https://www.ebi.ac.uk/pride/archive/projects/PXD000375</a>                                 | 24319056 |
| Saccharomyces cerevisiae | PXD003736    | <a href="https://www.ebi.ac.uk/pride/archive/projects/PXD003736">https://www.ebi.ac.uk/pride/archive/projects/PXD003736</a>                                 | 27251291 |
| Saccharomyces cerevisiae | PXD003854    | <a href="https://www.ebi.ac.uk/pride/archive/projects/PXD003854">https://www.ebi.ac.uk/pride/archive/projects/PXD003854</a>                                 | 27717283 |
| Saccharomyces cerevisiae | PXD005795    | <a href="https://www.ebi.ac.uk/pride/archive/projects/PXD005795">https://www.ebi.ac.uk/pride/archive/projects/PXD005795</a>                                 | 25767917 |
| Saccharomyces cerevisiae | PXD006009    | <a href="https://www.ebi.ac.uk/pride/archive/projects/PXD006009">https://www.ebi.ac.uk/pride/archive/projects/PXD006009</a>                                 | 28388408 |
| Saccharomyces cerevisiae | PXD011929    | <a href="https://www.ebi.ac.uk/pride/archive/projects/PXD011929">https://www.ebi.ac.uk/pride/archive/projects/PXD011929</a>                                 | 32284610 |
| Homo sapiens             | BioPlex_1    | <a href="https://bioplex.hms.harvard.edu/">https://bioplex.hms.harvard.edu/</a>                                                                             | 26186194 |
| Homo sapiens             | BioPlex_2    | <a href="https://bioplex.hms.harvard.edu/">https://bioplex.hms.harvard.edu/</a>                                                                             | 28514442 |
| Homo sapiens             | CCLC_2020    | <a href="https://portals.broadinstitute.org/cclc/about">https://portals.broadinstitute.org/cclc/about</a>                                                   | 31978347 |
| Homo sapiens             | Chorus1043   | <a href="https://chorusproject.org">https://chorusproject.org</a>                                                                                           | 27499296 |
| Homo sapiens             | CPTAC3_S041  | <a href="https://cptac-data-portal.georgetown.edu/cptac/s/S041">https://cptac-data-portal.georgetown.edu/cptac/s/S041</a>                                   | 29718670 |
| Homo sapiens             | CPTAC3_S044  | <a href="https://cptac-data-portal.georgetown.edu/cptac/s/S044">https://cptac-data-portal.georgetown.edu/cptac/s/S044</a>                                   | 31675502 |
| Homo sapiens             | CPTAC3_S051  | <a href="https://cptac-data-portal.georgetown.edu/cptac/s/S051">https://cptac-data-portal.georgetown.edu/cptac/s/S051</a>                                   | 31988290 |
| Homo sapiens             | CPTAC3_S053  | <a href="https://cptac-data-portal.georgetown.edu/cptac/s/S053">https://cptac-data-portal.georgetown.edu/cptac/s/S053</a>                                   | 32059776 |
| Homo sapiens             | MAC-tag      | <a href="http://www.peptideatlas.org/PASS/PASS01076">www.peptideatlas.org/PASS/PASS01076</a>                                                                | 29568061 |
| Homo sapiens             | MSV000082644 | <a href="https://massive.ucsd.edu/ProteoSAFe/dataset.jsp?accession=MSV000082644">https://massive.ucsd.edu/ProteoSAFe/dataset.jsp?accession=MSV000082644</a> | 30205044 |
| Homo sapiens             | PRDB000035   | <a href="https://www.proteomicsdb.org/#projects/35">https://www.proteomicsdb.org/#projects/35</a>                                                           | 23933261 |
| Homo sapiens             | PRDB004167   | <a href="https://www.proteomicsdb.org/#projects/4167/3085">https://www.proteomicsdb.org/#projects/4167/3085</a>                                             | 25892236 |
| Homo sapiens             | PXD000419    | <a href="https://www.ebi.ac.uk/pride/archive/projects/PXD000419">https://www.ebi.ac.uk/pride/archive/projects/PXD000419</a>                                 | 24136357 |
| Homo sapiens             | PXD000529    | <a href="https://www.ebi.ac.uk/pride/archive/projects/PXD000529">https://www.ebi.ac.uk/pride/archive/projects/PXD000529</a>                                 | 24328083 |
| Homo sapiens             | PXD000612    | <a href="https://www.ebi.ac.uk/pride/archive/projects/PXD000612">https://www.ebi.ac.uk/pride/archive/projects/PXD000612</a>                                 | 25159151 |
| Homo sapiens             | PXD000788    | <a href="https://www.ebi.ac.uk/pride/archive/projects/PXD000788">https://www.ebi.ac.uk/pride/archive/projects/PXD000788</a>                                 | 24797263 |
| Homo sapiens             | PXD001225    | <a href="https://www.ebi.ac.uk/pride/archive/projects/PXD001225">https://www.ebi.ac.uk/pride/archive/projects/PXD001225</a>                                 | 28134274 |
| Homo sapiens             | PXD001406    | <a href="https://www.ebi.ac.uk/pride/archive/projects/PXD001406">https://www.ebi.ac.uk/pride/archive/projects/PXD001406</a>                                 | 25657249 |
| Homo sapiens             | PXD001874    | <a href="https://www.ebi.ac.uk/pride/archive/projects/PXD001874">https://www.ebi.ac.uk/pride/archive/projects/PXD001874</a>                                 | 26825538 |
| Homo sapiens             | PXD001889    | <a href="https://www.ebi.ac.uk/pride/archive/projects/PXD001889">https://www.ebi.ac.uk/pride/archive/projects/PXD001889</a>                                 | 28248240 |
| Homo sapiens             | PXD001994    | <a href="https://www.ebi.ac.uk/pride/archive/projects/PXD001994">https://www.ebi.ac.uk/pride/archive/projects/PXD001994</a>                                 | 26832662 |
| Homo sapiens             | PXD002214    | <a href="https://www.ebi.ac.uk/pride/archive/projects/PXD002214">https://www.ebi.ac.uk/pride/archive/projects/PXD002214</a>                                 | 26371159 |
| Homo sapiens             | PXD002322    | <a href="https://www.ebi.ac.uk/pride/archive/projects/PXD002322">https://www.ebi.ac.uk/pride/archive/projects/PXD002322</a>                                 | 26344197 |
| Homo sapiens             | PXD002516    | <a href="https://www.ebi.ac.uk/pride/archive/projects/PXD002516">https://www.ebi.ac.uk/pride/archive/projects/PXD002516</a>                                 | 26892330 |
| Homo sapiens             | PXD002612    | <a href="https://www.ebi.ac.uk/pride/archive/projects/PXD002612">https://www.ebi.ac.uk/pride/archive/projects/PXD002612</a>                                 | 27799870 |
| Homo sapiens             | PXD002815    | <a href="https://www.ebi.ac.uk/pride/archive/projects/PXD002815">https://www.ebi.ac.uk/pride/archive/projects/PXD002815</a>                                 | 26496610 |
| Homo sapiens             | PXD002854    | <a href="https://www.ebi.ac.uk/pride/archive/projects/PXD002854">https://www.ebi.ac.uk/pride/archive/projects/PXD002854</a>                                 | 27135364 |
| Homo sapiens             | PXD003115    | <a href="https://www.ebi.ac.uk/pride/archive/projects/PXD003115">https://www.ebi.ac.uk/pride/archive/projects/PXD003115</a>                                 | 26657352 |
| Homo sapiens             | PXD003289    | <a href="https://www.ebi.ac.uk/pride/archive/projects/PXD003289">https://www.ebi.ac.uk/pride/archive/projects/PXD003289</a>                                 | 28083997 |

|              |           |                                                                                                                             |          |
|--------------|-----------|-----------------------------------------------------------------------------------------------------------------------------|----------|
| Homo sapiens | PXD003431 | <a href="https://www.ebi.ac.uk/pride/archive/projects/PXD003431">https://www.ebi.ac.uk/pride/archive/projects/PXD003431</a> | 27852650 |
| Homo sapiens | PXD003531 | <a href="https://www.ebi.ac.uk/pride/archive/projects/PXD003531">https://www.ebi.ac.uk/pride/archive/projects/PXD003531</a> | 28355574 |
| Homo sapiens | PXD003668 | <a href="https://www.ebi.ac.uk/pride/archive/projects/PXD003668">https://www.ebi.ac.uk/pride/archive/projects/PXD003668</a> | 27561551 |
| Homo sapiens | PXD003702 | <a href="https://www.ebi.ac.uk/pride/archive/projects/PXD003702">https://www.ebi.ac.uk/pride/archive/projects/PXD003702</a> | 27779199 |
| Homo sapiens | PXD003708 | <a href="https://www.ebi.ac.uk/pride/archive/projects/PXD003708">https://www.ebi.ac.uk/pride/archive/projects/PXD003708</a> | 27987026 |
| Homo sapiens | PXD003811 | <a href="https://www.ebi.ac.uk/pride/archive/projects/PXD003811">https://www.ebi.ac.uk/pride/archive/projects/PXD003811</a> | 28062795 |
| Homo sapiens | PXD003902 | <a href="https://www.ebi.ac.uk/pride/archive/projects/PXD003902">https://www.ebi.ac.uk/pride/archive/projects/PXD003902</a> | 28007913 |
| Homo sapiens | PXD003903 | <a href="https://www.ebi.ac.uk/pride/archive/projects/PXD003903">https://www.ebi.ac.uk/pride/archive/projects/PXD003903</a> | 28489815 |
| Homo sapiens | PXD003937 | <a href="https://www.ebi.ac.uk/pride/archive/projects/PXD003937">https://www.ebi.ac.uk/pride/archive/projects/PXD003937</a> | 27790916 |
| Homo sapiens | PXD003940 | <a href="https://www.ebi.ac.uk/pride/archive/projects/PXD003940">https://www.ebi.ac.uk/pride/archive/projects/PXD003940</a> | 27976581 |
| Homo sapiens | PXD003947 | <a href="https://www.ebi.ac.uk/pride/archive/projects/PXD003947">https://www.ebi.ac.uk/pride/archive/projects/PXD003947</a> | 27444420 |
| Homo sapiens | PXD003963 | <a href="https://www.ebi.ac.uk/pride/archive/projects/PXD003963">https://www.ebi.ac.uk/pride/archive/projects/PXD003963</a> | 28208246 |
| Homo sapiens | PXD003965 | <a href="https://www.ebi.ac.uk/pride/archive/projects/PXD003965">https://www.ebi.ac.uk/pride/archive/projects/PXD003965</a> | 28208246 |
| Homo sapiens | PXD003966 | <a href="https://www.ebi.ac.uk/pride/archive/projects/PXD003966">https://www.ebi.ac.uk/pride/archive/projects/PXD003966</a> | 28208246 |
| Homo sapiens | PXD003967 | <a href="https://www.ebi.ac.uk/pride/archive/projects/PXD003967">https://www.ebi.ac.uk/pride/archive/projects/PXD003967</a> | 28208246 |
| Homo sapiens | PXD003971 | <a href="https://www.ebi.ac.uk/pride/archive/projects/PXD003971">https://www.ebi.ac.uk/pride/archive/projects/PXD003971</a> | 28208246 |
| Homo sapiens | PXD004242 | <a href="https://www.ebi.ac.uk/pride/archive/projects/PXD004242">https://www.ebi.ac.uk/pride/archive/projects/PXD004242</a> | 28007936 |
| Homo sapiens | PXD004352 | <a href="https://www.ebi.ac.uk/pride/archive/projects/PXD004352">https://www.ebi.ac.uk/pride/archive/projects/PXD004352</a> | 28263321 |
| Homo sapiens | PXD004424 | <a href="https://www.ebi.ac.uk/pride/archive/projects/PXD004424">https://www.ebi.ac.uk/pride/archive/projects/PXD004424</a> | 27723984 |
| Homo sapiens | PXD004437 | <a href="https://www.ebi.ac.uk/pride/archive/projects/PXD004437">https://www.ebi.ac.uk/pride/archive/projects/PXD004437</a> | 27890679 |
| Homo sapiens | PXD004452 | <a href="https://www.ebi.ac.uk/pride/archive/projects/PXD004452">https://www.ebi.ac.uk/pride/archive/projects/PXD004452</a> | 28601559 |
| Homo sapiens | PXD004541 | <a href="https://www.ebi.ac.uk/pride/archive/projects/PXD004541">https://www.ebi.ac.uk/pride/archive/projects/PXD004541</a> | 27827301 |
| Homo sapiens | PXD004624 | <a href="https://www.ebi.ac.uk/pride/archive/projects/PXD004624">https://www.ebi.ac.uk/pride/archive/projects/PXD004624</a> | 27879288 |
| Homo sapiens | PXD004625 | <a href="https://www.ebi.ac.uk/pride/archive/projects/PXD004625">https://www.ebi.ac.uk/pride/archive/projects/PXD004625</a> | 27879288 |
| Homo sapiens | PXD004626 | <a href="https://www.ebi.ac.uk/pride/archive/projects/PXD004626">https://www.ebi.ac.uk/pride/archive/projects/PXD004626</a> | 27879288 |
| Homo sapiens | PXD004655 | <a href="https://www.ebi.ac.uk/pride/archive/projects/PXD004655">https://www.ebi.ac.uk/pride/archive/projects/PXD004655</a> | 28117667 |
| Homo sapiens | PXD004682 | <a href="https://www.ebi.ac.uk/pride/archive/projects/PXD004682">https://www.ebi.ac.uk/pride/archive/projects/PXD004682</a> | 28195392 |
| Homo sapiens | PXD004683 | <a href="https://www.ebi.ac.uk/pride/archive/projects/PXD004683">https://www.ebi.ac.uk/pride/archive/projects/PXD004683</a> | 28195392 |
| Homo sapiens | PXD004710 | <a href="https://www.ebi.ac.uk/pride/archive/projects/PXD004710">https://www.ebi.ac.uk/pride/archive/projects/PXD004710</a> | 27801565 |
| Homo sapiens | PXD004724 | <a href="https://www.ebi.ac.uk/pride/archive/projects/PXD004724">https://www.ebi.ac.uk/pride/archive/projects/PXD004724</a> | 28242843 |
| Homo sapiens | PXD004764 | <a href="https://www.ebi.ac.uk/pride/archive/projects/PXD004764">https://www.ebi.ac.uk/pride/archive/projects/PXD004764</a> | 28071820 |
| Homo sapiens | PXD004778 | <a href="https://www.ebi.ac.uk/pride/archive/projects/PXD004778">https://www.ebi.ac.uk/pride/archive/projects/PXD004778</a> | 28071820 |
| Homo sapiens | PXD004788 | <a href="https://www.ebi.ac.uk/pride/archive/projects/PXD004788">https://www.ebi.ac.uk/pride/archive/projects/PXD004788</a> | 28071820 |
| Homo sapiens | PXD004796 | <a href="https://www.ebi.ac.uk/pride/archive/projects/PXD004796">https://www.ebi.ac.uk/pride/archive/projects/PXD004796</a> | 28071820 |
| Homo sapiens | PXD004816 | <a href="https://www.ebi.ac.uk/pride/archive/projects/PXD004816">https://www.ebi.ac.uk/pride/archive/projects/PXD004816</a> | 28123004 |
| Homo sapiens | PXD004859 | <a href="https://www.ebi.ac.uk/pride/archive/projects/PXD004859">https://www.ebi.ac.uk/pride/archive/projects/PXD004859</a> | 27976366 |
| Homo sapiens | PXD004875 | <a href="https://www.ebi.ac.uk/pride/archive/projects/PXD004875">https://www.ebi.ac.uk/pride/archive/projects/PXD004875</a> | 27779380 |
| Homo sapiens | PXD004900 | <a href="https://www.ebi.ac.uk/pride/archive/projects/PXD004900">https://www.ebi.ac.uk/pride/archive/projects/PXD004900</a> | 27806443 |
| Homo sapiens | PXD005021 | <a href="https://www.ebi.ac.uk/pride/archive/projects/PXD005021">https://www.ebi.ac.uk/pride/archive/projects/PXD005021</a> | 28265047 |
| Homo sapiens | PXD005080 | <a href="https://www.ebi.ac.uk/pride/archive/projects/PXD005080">https://www.ebi.ac.uk/pride/archive/projects/PXD005080</a> | 28348171 |
| Homo sapiens | PXD005083 | <a href="https://www.ebi.ac.uk/pride/archive/projects/PXD005083">https://www.ebi.ac.uk/pride/archive/projects/PXD005083</a> | 28196878 |
| Homo sapiens | PXD005123 | <a href="https://www.ebi.ac.uk/pride/archive/projects/PXD005123">https://www.ebi.ac.uk/pride/archive/projects/PXD005123</a> | 27892468 |
| Homo sapiens | PXD005210 | <a href="https://www.ebi.ac.uk/pride/archive/projects/PXD005210">https://www.ebi.ac.uk/pride/archive/projects/PXD005210</a> | 27794609 |
| Homo sapiens | PXD005276 | <a href="https://www.ebi.ac.uk/pride/archive/projects/PXD005276">https://www.ebi.ac.uk/pride/archive/projects/PXD005276</a> | 28237943 |
| Homo sapiens | PXD005479 | <a href="https://www.ebi.ac.uk/pride/archive/projects/PXD005479">https://www.ebi.ac.uk/pride/archive/projects/PXD005479</a> | 27894104 |

|              |              |                                                                                                                                                                                                       |          |
|--------------|--------------|-------------------------------------------------------------------------------------------------------------------------------------------------------------------------------------------------------|----------|
| Homo sapiens | PXD005814    | <a href="https://www.ebi.ac.uk/pride/archive/projects/PXD005814">https://www.ebi.ac.uk/pride/archive/projects/PXD005814</a>                                                                           | 28258195 |
| Homo sapiens | PXD005846    | <a href="https://www.ebi.ac.uk/pride/archive/projects/PXD005846">https://www.ebi.ac.uk/pride/archive/projects/PXD005846</a>                                                                           | 28336715 |
| Homo sapiens | PXD006537    | <a href="https://www.ebi.ac.uk/pride/archive/projects/PXD006537">https://www.ebi.ac.uk/pride/archive/projects/PXD006537</a>                                                                           | 30137212 |
| Homo sapiens | PXD010093    | <a href="https://www.ebi.ac.uk/pride/archive/projects/PXD010093">https://www.ebi.ac.uk/pride/archive/projects/PXD010093</a>                                                                           | 30277781 |
| Homo sapiens | PXD010138    | <a href="https://www.ebi.ac.uk/pride/archive/projects/PXD010138">https://www.ebi.ac.uk/pride/archive/projects/PXD010138</a>                                                                           | 31207390 |
| Homo sapiens | PXD010154    | <a href="https://www.ebi.ac.uk/pride/archive/projects/PXD010154">https://www.ebi.ac.uk/pride/archive/projects/PXD010154</a>                                                                           | 30777892 |
| Homo sapiens | PXD010756    | <a href="https://www.ebi.ac.uk/pride/archive/projects/PXD010756">https://www.ebi.ac.uk/pride/archive/projects/PXD010756</a>                                                                           | 30833305 |
| Homo sapiens | PXD011254    | <a href="https://www.ebi.ac.uk/pride/archive/projects/PXD011254">https://www.ebi.ac.uk/pride/archive/projects/PXD011254</a>                                                                           | 30659192 |
| Homo sapiens | PXD011797    | <a href="https://www.ebi.ac.uk/pride/archive/projects/PXD011797">https://www.ebi.ac.uk/pride/archive/projects/PXD011797</a>                                                                           | 31308252 |
| Homo sapiens | PXD011929    | <a href="https://www.ebi.ac.uk/pride/archive/projects/PXD011929">https://www.ebi.ac.uk/pride/archive/projects/PXD011929</a>                                                                           | 32284610 |
| Homo sapiens | PXD012101    | <a href="https://www.ebi.ac.uk/pride/archive/projects/PXD012101">https://www.ebi.ac.uk/pride/archive/projects/PXD012101</a>                                                                           | 30768908 |
| Homo sapiens | PXD014031    | <a href="https://www.ebi.ac.uk/pride/archive/projects/PXD014031">https://www.ebi.ac.uk/pride/archive/projects/PXD014031</a>                                                                           | 32139545 |
| Homo sapiens | PXD014083    | <a href="https://www.ebi.ac.uk/pride/archive/projects/PXD014083">https://www.ebi.ac.uk/pride/archive/projects/PXD014083</a>                                                                           | 31592669 |
| Homo sapiens | PXD014557    | <a href="https://www.ebi.ac.uk/pride/archive/projects/PXD014557">https://www.ebi.ac.uk/pride/archive/projects/PXD014557</a>                                                                           | 31699905 |
| Homo sapiens | PXD015850    | <a href="https://www.ebi.ac.uk/pride/archive/projects/PXD015850">https://www.ebi.ac.uk/pride/archive/projects/PXD015850</a>                                                                           | 31614365 |
| Homo sapiens | PXD017269    | <a href="https://www.ebi.ac.uk/pride/archive/projects/PXD017269">https://www.ebi.ac.uk/pride/archive/projects/PXD017269</a>                                                                           | 32154592 |
| Homo sapiens | Syn10142580  | <a href="https://www.synapse.org/#!/Synapse:syn10142580/wiki/449336">https://www.synapse.org/#!/Synapse:syn10142580/wiki/449336</a>                                                                   | 29191947 |
| Homo sapiens | Syn10147608  | <a href="https://www.synapse.org/#!/Synapse:syn6126101/wiki/457943">https://www.synapse.org/#!/Synapse:syn6126101/wiki/457943</a>                                                                     | 28691493 |
| Homo sapiens | TCGA_BRCA    | <a href="https://cptac-data-portal.georgetown.edu/cptac/s/S029">https://cptac-data-portal.georgetown.edu/cptac/s/S029</a>                                                                             | 27251275 |
| Homo sapiens | TCGA_COCA    | <a href="https://cptc-xfer.uis.georgetown.edu/publicData/Phase_II_Data/TCGA_Colorectal_Cancer_S_022/">https://cptc-xfer.uis.georgetown.edu/publicData/Phase_II_Data/TCGA_Colorectal_Cancer_S_022/</a> | 25043054 |
| Homo sapiens | TCGA_OVCA    | <a href="https://cptac-data-portal.georgetown.edu/cptac/s/S026">https://cptac-data-portal.georgetown.edu/cptac/s/S026</a>                                                                             | 27372738 |
| Danio rerio  | PXD002455    | <a href="https://www.ebi.ac.uk/pride/archive/projects/PXD002455">https://www.ebi.ac.uk/pride/archive/projects/PXD002455</a>                                                                           | 26585961 |
| Danio rerio  | PXD003455    | <a href="https://www.ebi.ac.uk/pride/archive/projects/PXD003455">https://www.ebi.ac.uk/pride/archive/projects/PXD003455</a>                                                                           | 27696471 |
| Danio rerio  | PXD004209    | <a href="https://www.ebi.ac.uk/pride/archive/projects/PXD004209">https://www.ebi.ac.uk/pride/archive/projects/PXD004209</a>                                                                           | 27459904 |
| Danio rerio  | PXD004876    | <a href="https://www.ebi.ac.uk/pride/archive/projects/PXD004876">https://www.ebi.ac.uk/pride/archive/projects/PXD004876</a>                                                                           | 27898262 |
| Danio rerio  | PXD005129    | <a href="https://www.ebi.ac.uk/pride/archive/projects/PXD005129">https://www.ebi.ac.uk/pride/archive/projects/PXD005129</a>                                                                           | 29145436 |
| Danio rerio  | PXD005137    | <a href="https://www.ebi.ac.uk/pride/archive/projects/PXD005137">https://www.ebi.ac.uk/pride/archive/projects/PXD005137</a>                                                                           | 29145436 |
| Danio rerio  | PXD006098    | <a href="https://www.ebi.ac.uk/pride/archive/projects/PXD006098">https://www.ebi.ac.uk/pride/archive/projects/PXD006098</a>                                                                           | 28381614 |
| Danio rerio  | PXD011929    | <a href="https://www.ebi.ac.uk/pride/archive/projects/PXD011929">https://www.ebi.ac.uk/pride/archive/projects/PXD011929</a>                                                                           | 32284610 |
| Mus musculus | MSV000079361 | <a href="ftp://massive.ucsd.edu/MSV000079361/">ftp://massive.ucsd.edu/MSV000079361/</a>                                                                                                               | 26638175 |
| Mus musculus | PXD000288    | <a href="https://www.ebi.ac.uk/pride/archive/projects/PXD000288">https://www.ebi.ac.uk/pride/archive/projects/PXD000288</a>                                                                           | 25616865 |
| Mus musculus | PXD000501    | <a href="https://www.ebi.ac.uk/pride/archive/projects/PXD000501">https://www.ebi.ac.uk/pride/archive/projects/PXD000501</a>                                                                           | 24753479 |
| Mus musculus | PXD000666    | <a href="https://www.ebi.ac.uk/pride/archive/projects/PXD000666">https://www.ebi.ac.uk/pride/archive/projects/PXD000666</a>                                                                           | 25193168 |
| Mus musculus | PXD000747    | <a href="https://www.ebi.ac.uk/pride/archive/projects/PXD000747">https://www.ebi.ac.uk/pride/archive/projects/PXD000747</a>                                                                           | 25205226 |
| Mus musculus | PXD000867    | <a href="https://www.ebi.ac.uk/pride/archive/projects/PXD000867">https://www.ebi.ac.uk/pride/archive/projects/PXD000867</a>                                                                           | 25470552 |
| Mus musculus | PXD001007    | <a href="https://www.ebi.ac.uk/pride/archive/projects/PXD001007">https://www.ebi.ac.uk/pride/archive/projects/PXD001007</a>                                                                           | 24946870 |
| Mus musculus | PXD001250    | <a href="https://www.ebi.ac.uk/pride/archive/projects/PXD001250">https://www.ebi.ac.uk/pride/archive/projects/PXD001250</a>                                                                           | 26523646 |
| Mus musculus | PXD001293    | <a href="https://www.ebi.ac.uk/pride/archive/projects/PXD001293">https://www.ebi.ac.uk/pride/archive/projects/PXD001293</a>                                                                           | 25504905 |
| Mus musculus | PXD001404    | <a href="https://www.ebi.ac.uk/pride/archive/projects/PXD001404">https://www.ebi.ac.uk/pride/archive/projects/PXD001404</a>                                                                           | 25338131 |
| Mus musculus | PXD001514    | <a href="https://www.ebi.ac.uk/pride/archive/projects/PXD001514">https://www.ebi.ac.uk/pride/archive/projects/PXD001514</a>                                                                           | 26139848 |
| Mus musculus | PXD001597    | <a href="https://www.ebi.ac.uk/pride/archive/projects/PXD001597">https://www.ebi.ac.uk/pride/archive/projects/PXD001597</a>                                                                           | 26227174 |
| Mus musculus | PXD001641    | <a href="https://www.ebi.ac.uk/pride/archive/projects/PXD001641">https://www.ebi.ac.uk/pride/archive/projects/PXD001641</a>                                                                           | 25643707 |
| Mus musculus | PXD001729    | <a href="https://www.ebi.ac.uk/pride/archive/projects/PXD001729">https://www.ebi.ac.uk/pride/archive/projects/PXD001729</a>                                                                           | 26239621 |
| Mus musculus | PXD001792    | <a href="https://www.ebi.ac.uk/pride/archive/projects/PXD001792">https://www.ebi.ac.uk/pride/archive/projects/PXD001792</a>                                                                           | 26280412 |

|                         |           |                                                                                                                                             |          |
|-------------------------|-----------|---------------------------------------------------------------------------------------------------------------------------------------------|----------|
| Mus musculus            | PXD001859 | <a href="https://www.ebi.ac.uk/pride/archive/projects/PXD001859">https://www.ebi.ac.uk/pride/archive/projects/PXD001859</a>                 | 26258413 |
| Mus musculus            | PXD002152 | <a href="https://www.ebi.ac.uk/pride/archive/projects/PXD002152">https://www.ebi.ac.uk/pride/archive/projects/PXD002152</a>                 | 27302655 |
| Mus musculus            | PXD002156 | <a href="https://www.ebi.ac.uk/pride/archive/projects/PXD002156">https://www.ebi.ac.uk/pride/archive/projects/PXD002156</a>                 | 26080680 |
| Mus musculus            | PXD002466 | <a href="https://www.ebi.ac.uk/pride/archive/projects/PXD002466">https://www.ebi.ac.uk/pride/archive/projects/PXD002466</a>                 | 27625594 |
| Mus musculus            | PXD002582 | <a href="https://www.ebi.ac.uk/pride/archive/projects/PXD002582">https://www.ebi.ac.uk/pride/archive/projects/PXD002582</a>                 | 26229149 |
| Mus musculus            | PXD002896 | <a href="https://www.ebi.ac.uk/pride/archive/projects/PXD002896">https://www.ebi.ac.uk/pride/archive/projects/PXD002896</a>                 | 26732734 |
| Mus musculus            | PXD002925 | <a href="https://www.ebi.ac.uk/pride/archive/projects/PXD002925">https://www.ebi.ac.uk/pride/archive/projects/PXD002925</a>                 | 27027324 |
| Mus musculus            | PXD002927 | <a href="https://www.ebi.ac.uk/pride/archive/projects/PXD002927">https://www.ebi.ac.uk/pride/archive/projects/PXD002927</a>                 | 27180971 |
| Mus musculus            | PXD003155 | <a href="https://www.ebi.ac.uk/pride/archive/projects/PXD003155">https://www.ebi.ac.uk/pride/archive/projects/PXD003155</a>                 | 26850065 |
| Mus musculus            | PXD003442 | <a href="https://www.ebi.ac.uk/pride/archive/projects/PXD003442">https://www.ebi.ac.uk/pride/archive/projects/PXD003442</a>                 | 26900923 |
| Mus musculus            | PXD003555 | <a href="https://www.ebi.ac.uk/pride/archive/projects/PXD003555">https://www.ebi.ac.uk/pride/archive/projects/PXD003555</a>                 | 27490109 |
| Mus musculus            | PXD003656 | <a href="https://www.ebi.ac.uk/pride/archive/projects/PXD003656">https://www.ebi.ac.uk/pride/archive/projects/PXD003656</a>                 | 26969716 |
| Mus musculus            | PXD004072 | <a href="https://www.ebi.ac.uk/pride/archive/projects/PXD004072">https://www.ebi.ac.uk/pride/archive/projects/PXD004072</a>                 | 27188442 |
| Mus musculus            | PXD004087 | <a href="https://www.ebi.ac.uk/pride/archive/projects/PXD004087">https://www.ebi.ac.uk/pride/archive/projects/PXD004087</a>                 | 27629805 |
| Mus musculus            | PXD004152 | <a href="https://www.ebi.ac.uk/pride/archive/projects/PXD004152">https://www.ebi.ac.uk/pride/archive/projects/PXD004152</a>                 | 28328168 |
| Mus musculus            | PXD004612 | <a href="ftp://ftp.pride.ebi.ac.uk/pride/data/archive/2017/01/PXD004612">ftp://ftp.pride.ebi.ac.uk/pride/data/archive/2017/01/PXD004612</a> | 28071813 |
| Mus musculus            | PXD005184 | <a href="https://www.ebi.ac.uk/pride/archive/projects/PXD005184">https://www.ebi.ac.uk/pride/archive/projects/PXD005184</a>                 | 27806573 |
| Mus musculus            | PXD005312 | <a href="https://www.ebi.ac.uk/pride/archive/projects/PXD005312">https://www.ebi.ac.uk/pride/archive/projects/PXD005312</a>                 | 28066266 |
| Mus musculus            | PXD005449 | <a href="https://www.ebi.ac.uk/pride/archive/projects/PXD005449">https://www.ebi.ac.uk/pride/archive/projects/PXD005449</a>                 | 28174279 |
| Mus musculus            | PXD005492 | <a href="https://www.ebi.ac.uk/pride/archive/projects/PXD005492">https://www.ebi.ac.uk/pride/archive/projects/PXD005492</a>                 | 28285833 |
| Mus musculus            | PXD005635 | <a href="https://www.ebi.ac.uk/pride/archive/projects/PXD005635">https://www.ebi.ac.uk/pride/archive/projects/PXD005635</a>                 | 28345880 |
| Mus musculus            | PXD006002 | <a href="https://www.ebi.ac.uk/pride/archive/projects/PXD006002">https://www.ebi.ac.uk/pride/archive/projects/PXD006002</a>                 | 28362576 |
| Mus musculus            | PXD007974 | <a href="https://www.ebi.ac.uk/pride/archive/projects/PXD007974">https://www.ebi.ac.uk/pride/archive/projects/PXD007974</a>                 | 31926610 |
| Mus musculus            | PXD011304 | <a href="https://www.ebi.ac.uk/pride/archive/projects/PXD011304">https://www.ebi.ac.uk/pride/archive/projects/PXD011304</a>                 | 32325033 |
| Mus musculus            | PXD011929 | <a href="https://www.ebi.ac.uk/pride/archive/projects/PXD011929">https://www.ebi.ac.uk/pride/archive/projects/PXD011929</a>                 | 32284610 |
| Rattus norvegicus       | PXD001585 | <a href="https://www.ebi.ac.uk/pride/archive/projects/PXD001585">https://www.ebi.ac.uk/pride/archive/projects/PXD001585</a>                 | 25799991 |
| Rattus norvegicus       | PXD001984 | <a href="https://www.ebi.ac.uk/pride/archive/projects/PXD001984">https://www.ebi.ac.uk/pride/archive/projects/PXD001984</a>                 | 26330543 |
| Rattus norvegicus       | PXD001986 | <a href="https://www.ebi.ac.uk/pride/archive/projects/PXD001986">https://www.ebi.ac.uk/pride/archive/projects/PXD001986</a>                 | 26330543 |
| Rattus norvegicus       | PXD002188 | <a href="https://www.ebi.ac.uk/pride/archive/projects/PXD002188">https://www.ebi.ac.uk/pride/archive/projects/PXD002188</a>                 | 27053602 |
| Rattus norvegicus       | PXD003375 | <a href="https://www.ebi.ac.uk/pride/archive/projects/PXD003375">https://www.ebi.ac.uk/pride/archive/projects/PXD003375</a>                 | 27250205 |
| Rattus norvegicus       | PXD003520 | <a href="https://www.ebi.ac.uk/pride/archive/projects/PXD003520">https://www.ebi.ac.uk/pride/archive/projects/PXD003520</a>                 | 27358910 |
| Rattus norvegicus       | PXD004247 | <a href="https://www.ebi.ac.uk/pride/archive/projects/PXD004247">https://www.ebi.ac.uk/pride/archive/projects/PXD004247</a>                 | 27250205 |
| Rattus norvegicus       | PXD004889 | <a href="https://www.ebi.ac.uk/pride/archive/projects/PXD004889">https://www.ebi.ac.uk/pride/archive/projects/PXD004889</a>                 | 27764671 |
| Drosophila melanogaster | PXD001455 | <a href="https://www.ebi.ac.uk/pride/archive/projects/PXD001455">https://www.ebi.ac.uk/pride/archive/projects/PXD001455</a>                 | 25403936 |
| Drosophila melanogaster | PXD003755 | <a href="https://www.ebi.ac.uk/pride/archive/projects/PXD003755">https://www.ebi.ac.uk/pride/archive/projects/PXD003755</a>                 | 26823104 |
| Drosophila melanogaster | PXD003944 | <a href="https://www.ebi.ac.uk/pride/archive/projects/PXD003944">https://www.ebi.ac.uk/pride/archive/projects/PXD003944</a>                 | 27956707 |
| Drosophila melanogaster | PXD011929 | <a href="https://www.ebi.ac.uk/pride/archive/projects/PXD011929">https://www.ebi.ac.uk/pride/archive/projects/PXD011929</a>                 | 32284610 |
| Caenorhabditis elegans  | PXD011851 | <a href="https://www.ebi.ac.uk/pride/archive/projects/PXD011851">https://www.ebi.ac.uk/pride/archive/projects/PXD011851</a>                 | 30796049 |
| Caenorhabditis elegans  | PXD011859 | <a href="https://www.ebi.ac.uk/pride/archive/projects/PXD011859">https://www.ebi.ac.uk/pride/archive/projects/PXD011859</a>                 | 30796049 |
| Caenorhabditis elegans  | PXD011929 | <a href="https://www.ebi.ac.uk/pride/archive/projects/PXD011929">https://www.ebi.ac.uk/pride/archive/projects/PXD011929</a>                 | 32284610 |
| Caenorhabditis elegans  | PXD013720 | <a href="https://www.ebi.ac.uk/pride/archive/projects/PXD013720">https://www.ebi.ac.uk/pride/archive/projects/PXD013720</a>                 | 31527589 |
| Caenorhabditis elegans  | PXD014469 | <a href="https://www.ebi.ac.uk/pride/archive/projects/PXD014469">https://www.ebi.ac.uk/pride/archive/projects/PXD014469</a>                 | 31835171 |

|                        |           |                                                                                                                             |                                                                                                   |
|------------------------|-----------|-----------------------------------------------------------------------------------------------------------------------------|---------------------------------------------------------------------------------------------------|
| Caenorhabditis elegans | PXD014573 | <a href="https://www.ebi.ac.uk/pride/archive/projects/PXD014573">https://www.ebi.ac.uk/pride/archive/projects/PXD014573</a> | <a href="https://doi.org/10.1038/s42255-019-0123-y">https://doi.org/10.1038/s42255-019-0123-y</a> |
| Bos taurus             | PXD001741 | <a href="https://www.ebi.ac.uk/pride/archive/projects/PXD001741">https://www.ebi.ac.uk/pride/archive/projects/PXD001741</a> | 25818294                                                                                          |
| Bos taurus             | PXD014374 | <a href="https://www.ebi.ac.uk/pride/archive/projects/PXD014374">https://www.ebi.ac.uk/pride/archive/projects/PXD014374</a> | 32054912                                                                                          |
| Bos taurus             | PXD015735 | <a href="https://www.ebi.ac.uk/pride/archive/projects/PXD015735">https://www.ebi.ac.uk/pride/archive/projects/PXD015735</a> | 31887207                                                                                          |
| Bos taurus             | PXD016098 | <a href="https://www.ebi.ac.uk/pride/archive/projects/PXD016098">https://www.ebi.ac.uk/pride/archive/projects/PXD016098</a> | 32028040                                                                                          |
| Pan troglodytes        | PXD000419 | <a href="https://www.ebi.ac.uk/pride/archive/projects/PXD000419">https://www.ebi.ac.uk/pride/archive/projects/PXD000419</a> | 24136357                                                                                          |
| Pan troglodytes        | PXD015850 | <a href="https://www.ebi.ac.uk/pride/archive/projects/PXD015850">https://www.ebi.ac.uk/pride/archive/projects/PXD015850</a> | 31614365                                                                                          |
| Ovis aries             | PXD004556 | <a href="https://www.ebi.ac.uk/pride/archive/projects/PXD004556">https://www.ebi.ac.uk/pride/archive/projects/PXD004556</a> | 27784645                                                                                          |
| Ovis aries             | PXD004989 | <a href="https://www.ebi.ac.uk/pride/archive/projects/PXD004989">https://www.ebi.ac.uk/pride/archive/projects/PXD004989</a> | 28615994                                                                                          |
| Ovis aries             | PXD013822 | <a href="https://www.ebi.ac.uk/pride/archive/projects/PXD013822">https://www.ebi.ac.uk/pride/archive/projects/PXD013822</a> | 31136077                                                                                          |
| Ovis aries             | PXD014050 | <a href="https://www.ebi.ac.uk/pride/archive/projects/PXD014050">https://www.ebi.ac.uk/pride/archive/projects/PXD014050</a> | 31882954                                                                                          |

List of the 131 **ribosome profiling** datasets incorporated in OpenProt v1.6 along the associated species, data source and citation (PMID accession).

| Species                  | Study ID  | Data source                                                                                                                           | PMID     |
|--------------------------|-----------|---------------------------------------------------------------------------------------------------------------------------------------|----------|
| Saccharomyces cerevisiae | GSE34082  | <a href="https://www.ncbi.nlm.nih.gov/geo/query/acc.cgi?acc=GSE34082">https://www.ncbi.nlm.nih.gov/geo/query/acc.cgi?acc=GSE34082</a> | 22194413 |
| Saccharomyces cerevisiae | GSE82220  | <a href="https://www.ncbi.nlm.nih.gov/geo/query/acc.cgi?acc=GSE82220">https://www.ncbi.nlm.nih.gov/geo/query/acc.cgi?acc=GSE82220</a> | 27638886 |
| Saccharomyces cerevisiae | GSE67387  | <a href="https://www.ncbi.nlm.nih.gov/geo/query/acc.cgi?acc=GSE67387">https://www.ncbi.nlm.nih.gov/geo/query/acc.cgi?acc=GSE67387</a> | 26052047 |
| Saccharomyces cerevisiae | GSE75322  | <a href="https://www.ncbi.nlm.nih.gov/geo/query/acc.cgi?acc=GSE75322">https://www.ncbi.nlm.nih.gov/geo/query/acc.cgi?acc=GSE75322</a> | 26887592 |
| Saccharomyces cerevisiae | GSE63789  | <a href="https://www.ncbi.nlm.nih.gov/geo/query/acc.cgi?acc=GSE63789">https://www.ncbi.nlm.nih.gov/geo/query/acc.cgi?acc=GSE63789</a> | 25538139 |
| Saccharomyces cerevisiae | GSE45366  | <a href="https://www.ncbi.nlm.nih.gov/geo/query/acc.cgi?acc=GSE45366">https://www.ncbi.nlm.nih.gov/geo/query/acc.cgi?acc=GSE45366</a> | 23935536 |
| Homo sapiens             | GSE65885  | <a href="https://www.ncbi.nlm.nih.gov/geo/query/acc.cgi?acc=GSE30881">https://www.ncbi.nlm.nih.gov/geo/query/acc.cgi?acc=GSE30881</a> | 26687005 |
| Homo sapiens             | GSE97140  | <a href="https://www.ncbi.nlm.nih.gov/geo/query/acc.cgi?acc=GSE30919">https://www.ncbi.nlm.nih.gov/geo/query/acc.cgi?acc=GSE30919</a> | 28520920 |
| Homo sapiens             | GSE93133  | <a href="https://www.ncbi.nlm.nih.gov/geo/query/acc.cgi?acc=GSE30916">https://www.ncbi.nlm.nih.gov/geo/query/acc.cgi?acc=GSE30916</a> | 28108655 |
| Homo sapiens             | GSE97384  | <a href="https://www.ncbi.nlm.nih.gov/geo/query/acc.cgi?acc=GSE30920">https://www.ncbi.nlm.nih.gov/geo/query/acc.cgi?acc=GSE30920</a> | 28494858 |
| Homo sapiens             | GSE55195  | <a href="https://www.ncbi.nlm.nih.gov/geo/query/acc.cgi?acc=GSE30864">https://www.ncbi.nlm.nih.gov/geo/query/acc.cgi?acc=GSE30864</a> | 25621764 |
| Homo sapiens             | GSE73136  | <a href="https://www.ncbi.nlm.nih.gov/geo/query/acc.cgi?acc=GSE30895">https://www.ncbi.nlm.nih.gov/geo/query/acc.cgi?acc=GSE30895</a> | 26657557 |
| Homo sapiens             | GSE60426  | <a href="https://www.ncbi.nlm.nih.gov/geo/query/acc.cgi?acc=GSE30873">https://www.ncbi.nlm.nih.gov/geo/query/acc.cgi?acc=GSE30873</a> | 25263593 |
| Homo sapiens             | GSE58207  | <a href="https://www.ncbi.nlm.nih.gov/geo/query/acc.cgi?acc=GSE30867">https://www.ncbi.nlm.nih.gov/geo/query/acc.cgi?acc=GSE30867</a> | 25510491 |
| Homo sapiens             | GSE66927  | <a href="https://www.ncbi.nlm.nih.gov/geo/query/acc.cgi?acc=GSE30884">https://www.ncbi.nlm.nih.gov/geo/query/acc.cgi?acc=GSE30884</a> | 26538417 |
| Homo sapiens             | GSE51584  | <a href="https://www.ncbi.nlm.nih.gov/geo/query/acc.cgi?acc=GSE30860">https://www.ncbi.nlm.nih.gov/geo/query/acc.cgi?acc=GSE30860</a> | 25070500 |
| Homo sapiens             | GSE37744  | <a href="https://www.ncbi.nlm.nih.gov/geo/query/acc.cgi?acc=GSE30846">https://www.ncbi.nlm.nih.gov/geo/query/acc.cgi?acc=GSE30846</a> | 22836135 |
| Homo sapiens             | GSE49339  | <a href="https://www.ncbi.nlm.nih.gov/geo/query/acc.cgi?acc=GSE30857">https://www.ncbi.nlm.nih.gov/geo/query/acc.cgi?acc=GSE30857</a> | 23453015 |
| Homo sapiens             | SRA160745 | <a href="https://www.ncbi.nlm.nih.gov/geo/query/acc.cgi?acc=GSE30926">https://www.ncbi.nlm.nih.gov/geo/query/acc.cgi?acc=GSE30926</a> | 25486063 |
| Homo sapiens             | GSE61375  | <a href="https://www.ncbi.nlm.nih.gov/geo/query/acc.cgi?acc=GSE30875">https://www.ncbi.nlm.nih.gov/geo/query/acc.cgi?acc=GSE30875</a> | 25273840 |
| Homo sapiens             | GSE70211  | <a href="https://www.ncbi.nlm.nih.gov/geo/query/acc.cgi?acc=GSE30891">https://www.ncbi.nlm.nih.gov/geo/query/acc.cgi?acc=GSE30891</a> | 27309803 |
| Homo sapiens             | GSE59821  | <a href="https://www.ncbi.nlm.nih.gov/geo/query/acc.cgi?acc=GSE30869">https://www.ncbi.nlm.nih.gov/geo/query/acc.cgi?acc=GSE30869</a> | 26878238 |
| Homo sapiens             | GSE85864  | <a href="https://www.ncbi.nlm.nih.gov/geo/query/acc.cgi?acc=GSE30913">https://www.ncbi.nlm.nih.gov/geo/query/acc.cgi?acc=GSE30913</a> | 27681415 |
| Homo sapiens             | GSE70802  | <a href="https://www.ncbi.nlm.nih.gov/geo/query/acc.cgi?acc=GSE30892">https://www.ncbi.nlm.nih.gov/geo/query/acc.cgi?acc=GSE30892</a> | 27058758 |
| Homo sapiens             | GSE75290  | <a href="https://www.ncbi.nlm.nih.gov/geo/query/acc.cgi?acc=GSE30903">https://www.ncbi.nlm.nih.gov/geo/query/acc.cgi?acc=GSE30903</a> | 27232982 |
| Homo sapiens             | GSE68008  | <a href="https://www.ncbi.nlm.nih.gov/geo/query/acc.cgi?acc=GSE30888">https://www.ncbi.nlm.nih.gov/geo/query/acc.cgi?acc=GSE30888</a> | 26164698 |
| Homo sapiens             | GSE86214  | <a href="https://www.ncbi.nlm.nih.gov/geo/query/acc.cgi?acc=GSE30914">https://www.ncbi.nlm.nih.gov/geo/query/acc.cgi?acc=GSE30914</a> | 28106072 |
| Homo sapiens             | GSE41605  | <a href="https://www.ncbi.nlm.nih.gov/geo/query/acc.cgi?acc=GSE30847">https://www.ncbi.nlm.nih.gov/geo/query/acc.cgi?acc=GSE30847</a> | 23180859 |
| Homo sapiens             | GSE48785  | <a href="https://www.ncbi.nlm.nih.gov/geo/query/acc.cgi?acc=GSE30855">https://www.ncbi.nlm.nih.gov/geo/query/acc.cgi?acc=GSE30855</a> | 24171104 |
| Homo sapiens             | GSE56887  | <a href="https://www.ncbi.nlm.nih.gov/geo/query/acc.cgi?acc=GSE30865">https://www.ncbi.nlm.nih.gov/geo/query/acc.cgi?acc=GSE30865</a> | 25079319 |
| Homo sapiens             | GSE56924  | <a href="https://www.ncbi.nlm.nih.gov/geo/query/acc.cgi?acc=GSE30866">https://www.ncbi.nlm.nih.gov/geo/query/acc.cgi?acc=GSE30866</a> | 26338483 |
| Homo sapiens             | GSE65778  | <a href="https://www.ncbi.nlm.nih.gov/geo/query/acc.cgi?acc=GSE30880">https://www.ncbi.nlm.nih.gov/geo/query/acc.cgi?acc=GSE30880</a> | 25719440 |
| Homo sapiens             | GSE67902  | <a href="https://www.ncbi.nlm.nih.gov/geo/query/acc.cgi?acc=GSE30887">https://www.ncbi.nlm.nih.gov/geo/query/acc.cgi?acc=GSE30887</a> | 26305499 |
| Homo sapiens             | GSE69906  | <a href="https://www.ncbi.nlm.nih.gov/geo/query/acc.cgi?acc=GSE30890">https://www.ncbi.nlm.nih.gov/geo/query/acc.cgi?acc=GSE30890</a> | 26599541 |
| Homo sapiens             | GSE62247  | <a href="https://www.ncbi.nlm.nih.gov/geo/query/acc.cgi?acc=GSE30876">https://www.ncbi.nlm.nih.gov/geo/query/acc.cgi?acc=GSE30876</a> | 26399832 |
| Homo sapiens             | GSE52976  | <a href="https://www.ncbi.nlm.nih.gov/geo/query/acc.cgi?acc=GSE30862">https://www.ncbi.nlm.nih.gov/geo/query/acc.cgi?acc=GSE30862</a> | 25366541 |
| Homo sapiens             | GSE64962  | <a href="https://www.ncbi.nlm.nih.gov/geo/query/acc.cgi?acc=GSE30879">https://www.ncbi.nlm.nih.gov/geo/query/acc.cgi?acc=GSE30879</a> | 26729373 |
| Homo sapiens             | GSE73565  | <a href="https://www.ncbi.nlm.nih.gov/geo/query/acc.cgi?acc=GSE30897">https://www.ncbi.nlm.nih.gov/geo/query/acc.cgi?acc=GSE30897</a> | 26898226 |
| Homo sapiens             | GSE94460  | <a href="https://www.ncbi.nlm.nih.gov/geo/query/acc.cgi?acc=GSE94460">https://www.ncbi.nlm.nih.gov/geo/query/acc.cgi?acc=GSE94460</a> | 29170441 |

|              |           |                                                                                                                                               |          |
|--------------|-----------|-----------------------------------------------------------------------------------------------------------------------------------------------|----------|
| Homo sapiens | GSE102113 | <a href="https://www.ncbi.nlm.nih.gov/geo/query/acc.cgi?acc=GSE102113">https://www.ncbi.nlm.nih.gov/geo/query/acc.cgi?acc=GSE102113</a>       | 30449621 |
| Homo sapiens | GSE131809 | <a href="https://www.ncbi.nlm.nih.gov/geo/query/acc.cgi?acc=GSE131809">https://www.ncbi.nlm.nih.gov/geo/query/acc.cgi?acc=GSE131809</a>       | 31959994 |
| Homo sapiens | GSE132725 | <a href="https://www.ncbi.nlm.nih.gov/geo/query/acc.cgi?acc=GSE132725">https://www.ncbi.nlm.nih.gov/geo/query/acc.cgi?acc=GSE132725</a>       | 31340047 |
| Homo sapiens | GSE134752 | <a href="https://www.ncbi.nlm.nih.gov/geo/query/acc.cgi?acc=GSE134752">https://www.ncbi.nlm.nih.gov/geo/query/acc.cgi?acc=GSE134752</a>       |          |
| Homo sapiens | GSE22004  | <a href="https://www.ncbi.nlm.nih.gov/geo/query/acc.cgi?acc=GSE22004">https://www.ncbi.nlm.nih.gov/geo/query/acc.cgi?acc=GSE22004</a>         | 20703300 |
| Homo sapiens | GSE39561  | <a href="https://www.ncbi.nlm.nih.gov/geo/query/acc.cgi?acc=GSE39561">https://www.ncbi.nlm.nih.gov/geo/query/acc.cgi?acc=GSE39561</a>         | 22879431 |
| Homo sapiens | GSE48933  | <a href="https://www.ncbi.nlm.nih.gov/geo/query/acc.cgi?acc=GSE48933">https://www.ncbi.nlm.nih.gov/geo/query/acc.cgi?acc=GSE48933</a>         | 24301020 |
| Homo sapiens | GSE51424  | <a href="https://www.ncbi.nlm.nih.gov/geo/query/acc.cgi?acc=GSE51424">https://www.ncbi.nlm.nih.gov/geo/query/acc.cgi?acc=GSE51424</a>         | 25122893 |
| Homo sapiens | GSE52809  | <a href="https://www.ncbi.nlm.nih.gov/geo/query/acc.cgi?acc=GSE52809">https://www.ncbi.nlm.nih.gov/geo/query/acc.cgi?acc=GSE52809</a>         | 24476825 |
| Homo sapiens | GSE61012  | <a href="https://www.ncbi.nlm.nih.gov/geo/query/acc.cgi?acc=GSE61012">https://www.ncbi.nlm.nih.gov/geo/query/acc.cgi?acc=GSE61012</a>         | 25378630 |
| Homo sapiens | SRA056377 | <a href="https://www.ncbi.nlm.nih.gov/sra/?term=SRA056377">https://www.ncbi.nlm.nih.gov/sra/?term=SRA056377</a>                               | 22927429 |
| Homo sapiens | SRA061778 | <a href="https://trace.ddbj.nig.ac.jp/DRASearch/submission?acc=SRA061778">https://trace.ddbj.nig.ac.jp/DRASearch/submission?acc=SRA061778</a> | 23290916 |
| Homo sapiens | GSE103719 | <a href="https://www.ncbi.nlm.nih.gov/geo/query/acc.cgi?acc=GSE103719">https://www.ncbi.nlm.nih.gov/geo/query/acc.cgi?acc=GSE103719</a>       | 30257221 |
| Homo sapiens | GSE133111 | <a href="https://www.ncbi.nlm.nih.gov/geo/query/acc.cgi?acc=GSE133111">https://www.ncbi.nlm.nih.gov/geo/query/acc.cgi?acc=GSE133111</a>       |          |
| Homo sapiens | GSE143623 | <a href="https://www.ncbi.nlm.nih.gov/geo/query/acc.cgi?acc=GSE143623">https://www.ncbi.nlm.nih.gov/geo/query/acc.cgi?acc=GSE143623</a>       | 32029688 |
| Homo sapiens | GSE45833  | <a href="https://www.ncbi.nlm.nih.gov/geo/query/acc.cgi?acc=GSE45833">https://www.ncbi.nlm.nih.gov/geo/query/acc.cgi?acc=GSE45833</a>         | 23594524 |
| Homo sapiens | GSE60040  | <a href="https://www.ncbi.nlm.nih.gov/geo/query/acc.cgi?acc=GSE60040">https://www.ncbi.nlm.nih.gov/geo/query/acc.cgi?acc=GSE60040</a>         | 25989971 |
| Homo sapiens | GSE63570  | <a href="https://www.ncbi.nlm.nih.gov/geo/query/acc.cgi?acc=GSE63570">https://www.ncbi.nlm.nih.gov/geo/query/acc.cgi?acc=GSE63570</a>         | 25896322 |
| Homo sapiens | GSE105082 | <a href="https://www.ncbi.nlm.nih.gov/geo/query/acc.cgi?acc=GSE105082">https://www.ncbi.nlm.nih.gov/geo/query/acc.cgi?acc=GSE105082</a>       | 30591072 |
| Homo sapiens | GSE60095  | <a href="https://www.ncbi.nlm.nih.gov/geo/query/acc.cgi?acc=GSE60095">https://www.ncbi.nlm.nih.gov/geo/query/acc.cgi?acc=GSE60095</a>         | 25159147 |
| Homo sapiens | GSE65912  | <a href="https://www.ncbi.nlm.nih.gov/geo/query/acc.cgi?acc=GSE65912">https://www.ncbi.nlm.nih.gov/geo/query/acc.cgi?acc=GSE65912</a>         | 26297486 |
| Homo sapiens | GSE105172 | <a href="https://www.ncbi.nlm.nih.gov/geo/query/acc.cgi?acc=GSE105172">https://www.ncbi.nlm.nih.gov/geo/query/acc.cgi?acc=GSE105172</a>       | 31160600 |
| Homo sapiens | GSE79664  | <a href="https://www.ncbi.nlm.nih.gov/geo/query/acc.cgi?acc=GSE79664">https://www.ncbi.nlm.nih.gov/geo/query/acc.cgi?acc=GSE79664</a>         | 27153541 |
| Homo sapiens | GSE110323 | <a href="https://www.ncbi.nlm.nih.gov/geo/query/acc.cgi?acc=GSE110323">https://www.ncbi.nlm.nih.gov/geo/query/acc.cgi?acc=GSE110323</a>       | 30867593 |
| Homo sapiens | GSE111866 | <a href="https://www.ncbi.nlm.nih.gov/geo/query/acc.cgi?acc=GSE111866">https://www.ncbi.nlm.nih.gov/geo/query/acc.cgi?acc=GSE111866</a>       | 30102689 |
| Homo sapiens | GSE112276 | <a href="https://www.ncbi.nlm.nih.gov/geo/query/acc.cgi?acc=GSE112276">https://www.ncbi.nlm.nih.gov/geo/query/acc.cgi?acc=GSE112276</a>       | 31031084 |
| Homo sapiens | GSE112353 | <a href="https://www.ncbi.nlm.nih.gov/geo/query/acc.cgi?acc=GSE112353">https://www.ncbi.nlm.nih.gov/geo/query/acc.cgi?acc=GSE112353</a>       | 30355487 |
| Homo sapiens | GSE114636 | <a href="https://www.ncbi.nlm.nih.gov/geo/query/acc.cgi?acc=GSE114636">https://www.ncbi.nlm.nih.gov/geo/query/acc.cgi?acc=GSE114636</a>       | 30673779 |
| Homo sapiens | GSE115146 | <a href="https://www.ncbi.nlm.nih.gov/geo/query/acc.cgi?acc=GSE115146">https://www.ncbi.nlm.nih.gov/geo/query/acc.cgi?acc=GSE115146</a>       | 30297778 |
| Homo sapiens | GSE118050 | <a href="https://www.ncbi.nlm.nih.gov/geo/query/acc.cgi?acc=GSE118050">https://www.ncbi.nlm.nih.gov/geo/query/acc.cgi?acc=GSE118050</a>       | 30260431 |
| Homo sapiens | GSE122461 | <a href="https://www.ncbi.nlm.nih.gov/geo/query/acc.cgi?acc=GSE122461">https://www.ncbi.nlm.nih.gov/geo/query/acc.cgi?acc=GSE122461</a>       | 30640896 |
| Homo sapiens | GSE123564 | <a href="https://www.ncbi.nlm.nih.gov/geo/query/acc.cgi?acc=GSE123564">https://www.ncbi.nlm.nih.gov/geo/query/acc.cgi?acc=GSE123564</a>       | 30707697 |
| Homo sapiens | GSE125218 | <a href="https://www.ncbi.nlm.nih.gov/geo/query/acc.cgi?acc=GSE125218">https://www.ncbi.nlm.nih.gov/geo/query/acc.cgi?acc=GSE125218</a>       | 31819274 |
| Homo sapiens | GSE129869 | <a href="https://www.ncbi.nlm.nih.gov/geo/query/acc.cgi?acc=GSE129869">https://www.ncbi.nlm.nih.gov/geo/query/acc.cgi?acc=GSE129869</a>       | 31167946 |
| Homo sapiens | GSE130781 | <a href="https://www.ncbi.nlm.nih.gov/geo/query/acc.cgi?acc=GSE130781">https://www.ncbi.nlm.nih.gov/geo/query/acc.cgi?acc=GSE130781</a>       |          |
| Homo sapiens | GSE131112 | <a href="https://www.ncbi.nlm.nih.gov/geo/query/acc.cgi?acc=GSE131112">https://www.ncbi.nlm.nih.gov/geo/query/acc.cgi?acc=GSE131112</a>       | 31284728 |
| Danio rerio  | GSE34743  | <a href="https://www.ncbi.nlm.nih.gov/geo/query/acc.cgi?acc=GSE34743">https://www.ncbi.nlm.nih.gov/geo/query/acc.cgi?acc=GSE34743</a>         | 22422859 |
| Danio rerio  | GSE46512  | <a href="https://www.ncbi.nlm.nih.gov/geo/query/acc.cgi?acc=GSE46512">https://www.ncbi.nlm.nih.gov/geo/query/acc.cgi?acc=GSE46512</a>         | 23698349 |
| Danio rerio  | GSE47558  | <a href="https://www.ncbi.nlm.nih.gov/geo/query/acc.cgi?acc=GSE47558">https://www.ncbi.nlm.nih.gov/geo/query/acc.cgi?acc=GSE47558</a>         | 24056933 |
| Danio rerio  | GSE52809  | <a href="https://www.ncbi.nlm.nih.gov/geo/query/acc.cgi?acc=GSE52809">https://www.ncbi.nlm.nih.gov/geo/query/acc.cgi?acc=GSE52809</a>         | 24476825 |
| Danio rerio  | GSE53693  | <a href="https://www.ncbi.nlm.nih.gov/geo/query/acc.cgi?acc=GSE53693">https://www.ncbi.nlm.nih.gov/geo/query/acc.cgi?acc=GSE53693</a>         | 24705786 |
| Mus musculus | GSE83823  | <a href="https://www.ncbi.nlm.nih.gov/geo/query/acc.cgi?acc=GSE83823">https://www.ncbi.nlm.nih.gov/geo/query/acc.cgi?acc=GSE83823</a>         | 27899360 |
| Mus musculus | GSE72066  | <a href="https://www.ncbi.nlm.nih.gov/geo/query/acc.cgi?acc=GSE72066">https://www.ncbi.nlm.nih.gov/geo/query/acc.cgi?acc=GSE72066</a>         | 27306184 |
| Mus musculus | GSE50983  | <a href="https://www.ncbi.nlm.nih.gov/geo/query/acc.cgi?acc=GSE50983">https://www.ncbi.nlm.nih.gov/geo/query/acc.cgi?acc=GSE50983</a>         | 25063675 |



|                         |           |                                                                                                                                               |          |
|-------------------------|-----------|-----------------------------------------------------------------------------------------------------------------------------------------------|----------|
| Mus musculus            | GSE74139  | <a href="https://www.ncbi.nlm.nih.gov/geo/query/acc.cgi?acc=GSE74139">https://www.ncbi.nlm.nih.gov/geo/query/acc.cgi?acc=GSE74139</a>         | 26638175 |
| Mus musculus            | GSE84112  | <a href="https://www.ncbi.nlm.nih.gov/geo/query/acc.cgi?acc=GSE84112">https://www.ncbi.nlm.nih.gov/geo/query/acc.cgi?acc=GSE84112</a>         | 27956496 |
| Mus musculus            | SRA160745 | <a href="https://trace.ddbj.nig.ac.jp/DRAsearch/submission?acc=SRA160745">https://trace.ddbj.nig.ac.jp/DRAsearch/submission?acc=SRA160745</a> | 25486063 |
| Mus musculus            | GSE82220  | <a href="https://www.ncbi.nlm.nih.gov/geo/query/acc.cgi?acc=GSE82220">https://www.ncbi.nlm.nih.gov/geo/query/acc.cgi?acc=GSE82220</a>         | 27638886 |
| Mus musculus            | GSE51424  | <a href="https://www.ncbi.nlm.nih.gov/geo/query/acc.cgi?acc=GSE51424">https://www.ncbi.nlm.nih.gov/geo/query/acc.cgi?acc=GSE51424</a>         | 25122893 |
| Mus musculus            | GSE78163  | <a href="https://www.ncbi.nlm.nih.gov/geo/query/acc.cgi?acc=GSE78163">https://www.ncbi.nlm.nih.gov/geo/query/acc.cgi?acc=GSE78163</a>         | 27380875 |
| Mus musculus            | GSE30839  | <a href="https://www.ncbi.nlm.nih.gov/geo/query/acc.cgi?acc=GSE30839">https://www.ncbi.nlm.nih.gov/geo/query/acc.cgi?acc=GSE30839</a>         | 22056041 |
| Mus musculus            | GSE60095  | <a href="https://www.ncbi.nlm.nih.gov/geo/query/acc.cgi?acc=GSE60095">https://www.ncbi.nlm.nih.gov/geo/query/acc.cgi?acc=GSE60095</a>         | 25159147 |
| Mus musculus            | GSE74683  | <a href="https://www.ncbi.nlm.nih.gov/geo/query/acc.cgi?acc=GSE74683">https://www.ncbi.nlm.nih.gov/geo/query/acc.cgi?acc=GSE74683</a>         | 26651292 |
| Mus musculus            | SRA056377 | <a href="https://www.ncbi.nlm.nih.gov/sra/?term=SRA056377">https://www.ncbi.nlm.nih.gov/sra/?term=SRA056377</a>                               | 22927429 |
| Mus musculus            | GSE72851  | <a href="https://www.ncbi.nlm.nih.gov/geo/query/acc.cgi?acc=GSE72851">https://www.ncbi.nlm.nih.gov/geo/query/acc.cgi?acc=GSE72851</a>         | 28225755 |
| Mus musculus            | GSE53743  | <a href="https://www.ncbi.nlm.nih.gov/geo/query/acc.cgi?acc=GSE53743">https://www.ncbi.nlm.nih.gov/geo/query/acc.cgi?acc=GSE53743</a>         | 25215492 |
| Mus musculus            | GSE69800  | <a href="https://www.ncbi.nlm.nih.gov/geo/query/acc.cgi?acc=GSE69800">https://www.ncbi.nlm.nih.gov/geo/query/acc.cgi?acc=GSE69800</a>         | 27161320 |
| Mus musculus            | GSE89108  | <a href="https://www.ncbi.nlm.nih.gov/geo/query/acc.cgi?acc=GSE89108">https://www.ncbi.nlm.nih.gov/geo/query/acc.cgi?acc=GSE89108</a>         | 28720757 |
| Mus musculus            | GSE83332  | <a href="https://www.ncbi.nlm.nih.gov/geo/query/acc.cgi?acc=GSE83332">https://www.ncbi.nlm.nih.gov/geo/query/acc.cgi?acc=GSE83332</a>         | 28077873 |
| Mus musculus            | GSE36892  | <a href="https://www.ncbi.nlm.nih.gov/geo/query/acc.cgi?acc=GSE36892">https://www.ncbi.nlm.nih.gov/geo/query/acc.cgi?acc=GSE36892</a>         | 22552098 |
| Mus musculus            | GSE46038  | <a href="https://www.ncbi.nlm.nih.gov/geo/query/acc.cgi?acc=GSE46038">https://www.ncbi.nlm.nih.gov/geo/query/acc.cgi?acc=GSE46038</a>         | 23696641 |
| Mus musculus            | GSE41785  | <a href="https://www.ncbi.nlm.nih.gov/geo/query/acc.cgi?acc=GSE41785">https://www.ncbi.nlm.nih.gov/geo/query/acc.cgi?acc=GSE41785</a>         | 23766421 |
| Mus musculus            | GSE73369  | <a href="https://www.ncbi.nlm.nih.gov/geo/query/acc.cgi?acc=GSE73369">https://www.ncbi.nlm.nih.gov/geo/query/acc.cgi?acc=GSE73369</a>         | 26443847 |
| Mus musculus            | GSE103667 | <a href="https://www.ncbi.nlm.nih.gov/geo/query/acc.cgi?acc=GSE103667">https://www.ncbi.nlm.nih.gov/geo/query/acc.cgi?acc=GSE103667</a>       | 29576526 |
| Mus musculus            | GSE115106 | <a href="https://www.ncbi.nlm.nih.gov/geo/query/acc.cgi?acc=GSE115106">https://www.ncbi.nlm.nih.gov/geo/query/acc.cgi?acc=GSE115106</a>       | 30728504 |
| Mus musculus            | GSE105147 | <a href="https://www.ncbi.nlm.nih.gov/geo/query/acc.cgi?acc=GSE105147">https://www.ncbi.nlm.nih.gov/geo/query/acc.cgi?acc=GSE105147</a>       | 30643286 |
| Mus musculus            | GSE115110 | <a href="https://www.ncbi.nlm.nih.gov/geo/query/acc.cgi?acc=GSE115110">https://www.ncbi.nlm.nih.gov/geo/query/acc.cgi?acc=GSE115110</a>       | 31296853 |
| Mus musculus            | GSE106529 | <a href="https://www.ncbi.nlm.nih.gov/geo/query/acc.cgi?acc=GSE106529">https://www.ncbi.nlm.nih.gov/geo/query/acc.cgi?acc=GSE106529</a>       | 31186416 |
| Mus musculus            | GSE119365 | <a href="https://www.ncbi.nlm.nih.gov/geo/query/acc.cgi?acc=GSE119365">https://www.ncbi.nlm.nih.gov/geo/query/acc.cgi?acc=GSE119365</a>       | 31033440 |
| Mus musculus            | GSE124280 | <a href="https://www.ncbi.nlm.nih.gov/geo/query/acc.cgi?acc=GSE124280">https://www.ncbi.nlm.nih.gov/geo/query/acc.cgi?acc=GSE124280</a>       | 31924774 |
| Mus musculus            | GSE129816 | <a href="https://www.ncbi.nlm.nih.gov/geo/query/acc.cgi?acc=GSE129816">https://www.ncbi.nlm.nih.gov/geo/query/acc.cgi?acc=GSE129816</a>       | 31483294 |
| Mus musculus            | GSE129818 | <a href="https://www.ncbi.nlm.nih.gov/geo/query/acc.cgi?acc=GSE129818">https://www.ncbi.nlm.nih.gov/geo/query/acc.cgi?acc=GSE129818</a>       | 31483294 |
| Mus musculus            | GSE130898 | <a href="https://www.ncbi.nlm.nih.gov/geo/query/acc.cgi?acc=GSE130898">https://www.ncbi.nlm.nih.gov/geo/query/acc.cgi?acc=GSE130898</a>       | 31371437 |
| Mus musculus            | GSE141599 | <a href="https://www.ncbi.nlm.nih.gov/geo/query/acc.cgi?acc=GSE141599">https://www.ncbi.nlm.nih.gov/geo/query/acc.cgi?acc=GSE141599</a>       | 31999954 |
| Mus musculus            | GSE142802 | <a href="https://www.ncbi.nlm.nih.gov/geo/query/acc.cgi?acc=GSE142802">https://www.ncbi.nlm.nih.gov/geo/query/acc.cgi?acc=GSE142802</a>       |          |
| Mus musculus            | GSE52809  | <a href="https://www.ncbi.nlm.nih.gov/geo/query/acc.cgi?acc=GSE52809">https://www.ncbi.nlm.nih.gov/geo/query/acc.cgi?acc=GSE52809</a>         | 24476825 |
| Mus musculus            | GSE58423  | <a href="https://www.ncbi.nlm.nih.gov/geo/query/acc.cgi?acc=GSE58423">https://www.ncbi.nlm.nih.gov/geo/query/acc.cgi?acc=GSE58423</a>         | 25380226 |
| Mus musculus            | GSE59793  | <a href="https://www.ncbi.nlm.nih.gov/geo/query/acc.cgi?acc=GSE59793">https://www.ncbi.nlm.nih.gov/geo/query/acc.cgi?acc=GSE59793</a>         | 25745177 |
| Mus musculus            | GSE67305  | <a href="https://www.ncbi.nlm.nih.gov/geo/query/acc.cgi?acc=GSE67305">https://www.ncbi.nlm.nih.gov/geo/query/acc.cgi?acc=GSE67305</a>         | 26486724 |
| Mus musculus            | PRJEB7207 | <a href="http://www.ebi.ac.uk/ena/data/view/PRJEB7207">http://www.ebi.ac.uk/ena/data/view/PRJEB7207</a>                                       | 25873627 |
| Mus musculus            | GSE22004  | <a href="https://www.ncbi.nlm.nih.gov/geo/query/acc.cgi?acc=GSE22004">https://www.ncbi.nlm.nih.gov/geo/query/acc.cgi?acc=GSE22004</a>         | 20703300 |
| Rattus norvegicus       | GSE55195  | <a href="https://www.ncbi.nlm.nih.gov/geo/query/acc.cgi?acc=GSE55195">https://www.ncbi.nlm.nih.gov/geo/query/acc.cgi?acc=GSE55195</a>         | 25621764 |
| Rattus norvegicus       | GSE66715  | <a href="https://www.ncbi.nlm.nih.gov/geo/query/acc.cgi?acc=GSE66715">https://www.ncbi.nlm.nih.gov/geo/query/acc.cgi?acc=GSE66715</a>         | 27135913 |
| Rattus norvegicus       | GSE110426 | <a href="https://www.ncbi.nlm.nih.gov/geo/query/acc.cgi?acc=GSE110426">https://www.ncbi.nlm.nih.gov/geo/query/acc.cgi?acc=GSE110426</a>       | 29878763 |
| Drosophila melanogaster | GSE60384  | <a href="https://www.ncbi.nlm.nih.gov/geo/query/acc.cgi?acc=GSE60384">https://www.ncbi.nlm.nih.gov/geo/query/acc.cgi?acc=GSE60384</a>         | 25144939 |
| Drosophila melanogaster | GSE49197  | <a href="https://www.ncbi.nlm.nih.gov/geo/query/acc.cgi?acc=GSE49197">https://www.ncbi.nlm.nih.gov/geo/query/acc.cgi?acc=GSE49197</a>         | 24302569 |
| Drosophila melanogaster | GSE52799  | <a href="https://www.ncbi.nlm.nih.gov/geo/query/acc.cgi?acc=GSE52799">https://www.ncbi.nlm.nih.gov/geo/query/acc.cgi?acc=GSE52799</a>         | 24882012 |

|                        |           |                                                                                                                                       |          |
|------------------------|-----------|---------------------------------------------------------------------------------------------------------------------------------------|----------|
| Caenorhabditis elegans | GSE62859  | <a href="https://www.ncbi.nlm.nih.gov/geo/query/acc.cgi?acc=GSE30877">https://www.ncbi.nlm.nih.gov/geo/query/acc.cgi?acc=GSE30877</a> | 25378320 |
| Caenorhabditis elegans | GSE52910  | <a href="https://www.ncbi.nlm.nih.gov/geo/query/acc.cgi?acc=GSE30861">https://www.ncbi.nlm.nih.gov/geo/query/acc.cgi?acc=GSE30861</a> | 24440504 |
| Caenorhabditis elegans | GSE67387  | <a href="https://www.ncbi.nlm.nih.gov/geo/query/acc.cgi?acc=GSE30885">https://www.ncbi.nlm.nih.gov/geo/query/acc.cgi?acc=GSE30885</a> | 26052047 |
| Caenorhabditis elegans | SRA049309 | <a href="https://www.ncbi.nlm.nih.gov/geo/query/acc.cgi?acc=GSE30921">https://www.ncbi.nlm.nih.gov/geo/query/acc.cgi?acc=GSE30921</a> | 22045228 |
| Caenorhabditis elegans | SRA055804 | <a href="https://www.ncbi.nlm.nih.gov/geo/query/acc.cgi?acc=GSE30923">https://www.ncbi.nlm.nih.gov/geo/query/acc.cgi?acc=GSE30923</a> | 22855835 |

[Back to the table of contents](#)

## Supplementary S5

### Getting started tutorials for OpenProt v1.6

The tutorials below give detailed instructions to navigate the [genome browser](#), the [query interface](#), the [submission platform](#) and the [downloads interface](#) on OpenProt v1.6.

\*\*\* Getting started with the **genome browser** in OpenProt \*\*\*

If you want to browse the genome of a specific species for AltORFs (all predicted and those with evidence of expression), click **Browse**.

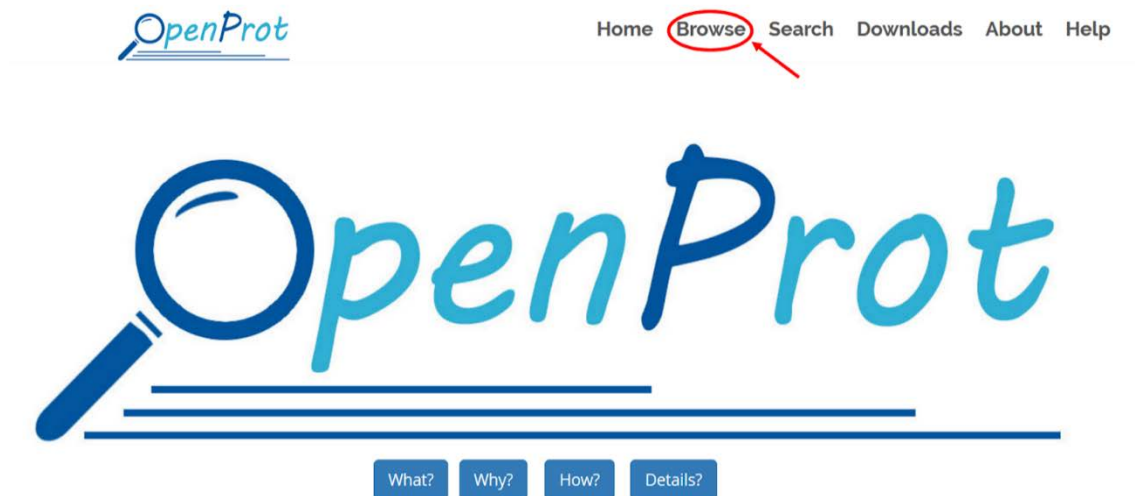

You will then be directed towards a query page.

1 Species: Homo sapiens

2 Assembly: GRCh38.p5 (GCA\_000001405.20)

3 Annotation: Ensembl (GRCh38.83)

4 Gene: gene symbol

5 transcript: transcript accession

6 Protein: protein accession

7 chr:1:754,037..854,105

Powered by [Biodaalliance](#)

■ Transcript ■ RefProt ■ AltProt ■ Isoform ■ RefProt peptide match ■ AltProt peptide match ■ Isoform peptide match

You can input your search criteria as follow:

1. Select a **species** (default is *Homo sapiens*).
2. Select an **assembly** (default is the most recent in each species).
3. Select an **annotation** (default is Ensembl). Both Ensembl and NCBI RefSeq annotations are used by OpenProt to predict AltProts, and the browser is available for both. If you want to know why OpenProt supports multiple annotations, you can click [here](#). For more informations on how to display both annotations on the browser, click [here](#).
4. Enter the name of your **gene** of interest.

Alternatively, you can also search by **transcript** or **protein** accessions (5 and 6 respectively). Both Ensembl and RefSeq accession IDs are accepted (depending on the chosen annotation). You can also directly enter genomic coordinates of interest (7).

Below is an example for the *COL1A1* gene. Once you have entered your gene name (1) and launched the search (2), your results will appear centered in the browser window.

The screenshot shows the OpenProt web interface. At the top, there is a navigation menu with 'Home', 'Browse', 'Search', 'Downloads', 'About', and 'Help'. Below this is a search bar with 'COL1A1' entered. The search criteria are set to Species: Homo sapiens, Assembly: GRCh38.p5 (GCA\_000001405.20), and Annotation: Ensembl (GRCh38.83). The search results are displayed in a browser window with genomic coordinates. The tracks shown are: 1. Genome (chr17:50,183,288..50,201,648), 2. Transcript (Ensembl (GRCh38.83)) showing various transcripts like ENST00000510710, ENST00000511732, ENST00000494334, ENST00000483440, ENST00000485870, ENST00000474844, ENST00000486572, ENST00000478387, ENST00000495477, ENST00000507689, ENST00000504289, and ENST00000471344. 3. Protein (Ensembl (GRCh38.83)) showing various protein isoforms like IP\_714773, IP\_257570, IP\_257572, IP\_714768, IP\_257577, IP\_714767, IP\_714785, IP\_714783, IP\_714781, IP\_714775, IP\_257579, IP\_714770, IP\_257577, IP\_257584, IP\_714764, IP\_714764, IP\_714765, IP\_714762, IP\_714760, and IP\_714760. The legend at the bottom indicates: Transcript (blue), RefProt (green), AltProt (red), Isoform (yellow), RefProt peptide match (green), AltProt peptide match (red), and Isoform peptide match (yellow).

You can visualize the genomic coordinates (1) and the different tracks. The first track contains transcripts for the chosen annotations (2 - here, Ensembl). The second contains predicted proteins (3). The colour code is indicated below the browser with the transcripts annotated in blue, the RefProt in green, the AltProt in red and the Novel Isoforms in yellow. You can widen or narrow the browser window (4) and custom your display by adding or removing a track from the registry (5) The registry includes: genome, transcript, protein and peptide detection *by default*.

If you scroll down on the genome browser (1), the last track will appear and contains the peptide detected by MS (1).

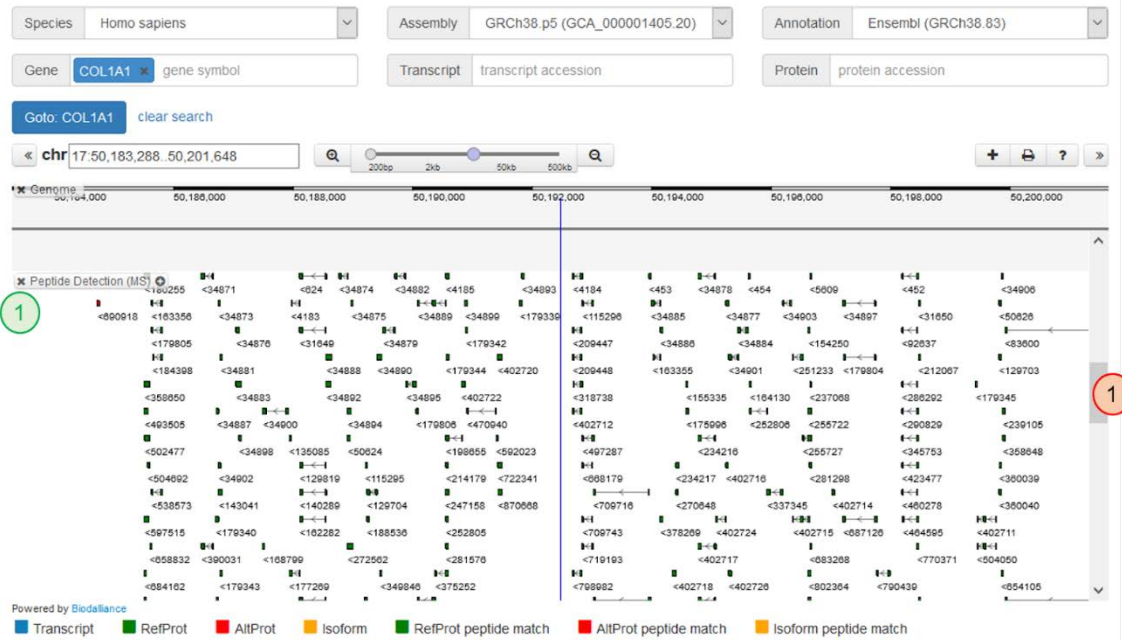

Furthermore, you can **click on a peptide** and this will display the details associated to this peptide in a pop-up window.

Species: Homo sapiens | Gene: COL1A1 | Goto: COL1A1 | chr 17:50,183,288..50,201,648

### Peptide Spectrum Match

Peptide Sequence: GEPGPPGAGFAGPPGADGQPGAK (1)

Genomic coordinates: 17:50190082:50190372 (2)

Assembly: GRCh38.p5

| Protein (3)     | Transcript      | Annotation (4)      |                              |
|-----------------|-----------------|---------------------|------------------------------|
| ENSP00000225964 | ENST00000225964 | Ensembl (GRCh38.83) | <a href="#">goto details</a> |
| NP_000079.2     | NM_000088.3     | RefSeq (GRCh38.p7)  | <a href="#">goto details</a> |
| XP_005257115.2  | XM_005257058.3  | RefSeq (GRCh38.p7)  | <a href="#">goto details</a> |
| XP_005257116.2  | XM_005257059.4  | RefSeq (GRCh38.p7)  | <a href="#">goto details</a> |
| XP_011522643.1  | XM_011524341.1  | RefSeq (GRCh38.p7)  | <a href="#">goto details</a> |

Close

The pop-up windows displays the peptide sequence (1), its genomic coordinates (2) and the proteins assigned to that peptide (3). All proteins this peptide has been assigned to are listed, across both annotations (Ensembl + RefSeq). For more information on peptide assignment rules, click [here](#). The details page of the assigned proteins can be consulted directly by clicking on the goto details link (4).

Such pop-up windows are also displayed when clicking on a protein or a **transcript** (as shown below).

Transcript accession ENST00000471344

|                     |                      |
|---------------------|----------------------|
| Genomic coordinates | 17:50193550-50195665 |
| Annotation          | Ensembl (GRCh38.83)  |

Protein Summary

- IP\_714766 Ensembl (GRCh38.83) goto details
- IP\_714765 Ensembl (GRCh38.83) goto details

Close

ENST00000471344

Species: Homo sapiens  
Gene: COL1A1  
Goto: COL1A1  
chr17:50,183,288-50,201,648  
Transcript (Ensembl (GRCh38.83))  
Protein (Ensembl (GRCh38.83))

Powered by Biodaliance  
Legend: Transcript, RefProt, AltProt, Isoform, RefProt peptide match, AltProt peptide match, Isoform peptide match

The transcript associated pop-up window contains the transcript genomic coordinates (1) and a list of all the associated proteins to this transcript (2). Each protein can then be accessed by clicking on the goto details link (3).

\*\*\* Getting started with the **query interface** in OpenProt \*\*\*

If you want to know if a specific gene contains AltORFs (all predicted and those with evidence of expression), click **Search**.

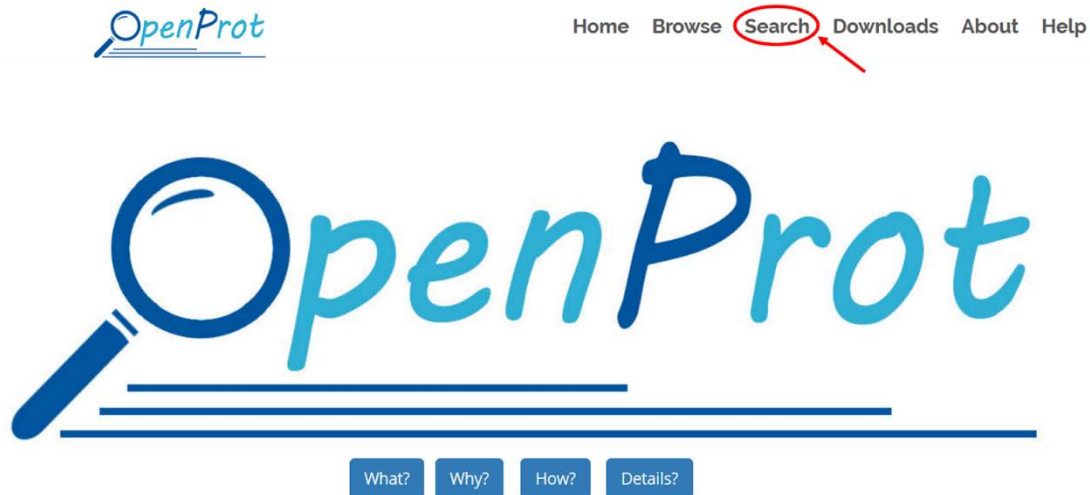

You will then be redirected towards a query page:

Genome

Species: Homo sapiens

Assembly: GRCh38.p5 (GCA\_000001405.20)

Annotation: Ensembl+RefSeq (Ensembl (GRCh38))

Gene: list of gene symbols

Transcript: list of transcript accessions

Protein: list of protein accessions

Advanced Search ([edit search criteria](#))

Show only proteins with experimental evidence

Show only proteins detected by MS

Show only proteins detected by ribosome profiling studies

Show only proteins with predicted domains

Show only AltProts

Show only Isoforms

Order by: MS Score (desc) / TE (desc) / Do

You can input your search criteria as follow:

1. Select a **species** (default is *Homo sapiens*).
2. Select an **assembly** (default is the most recent in each species).
3. Select an **annotation** (default is *Ensembl+RefSeq*). Several annotations are used by OpenProt to predict AltProts. Ensembl, NCBI RefSeq and combined Ensembl+RefSeq annotations are available for all species. If you want to know why OpenProt supports multiple annotations, you can click [here](#).
4. Enter the name of your **gene** of interest.

Alternatively, you can also search by **transcript** or **protein** accessions (5 and 6 respectively). Both Ensembl and RefSeq accession IDs are accepted. Proteins may be searched on one or more specific transcripts. Similarly, one or more proteins can be searched for simultaneously.

Below is an example for the *COL1A1* gene. Once you have entered your gene name and launched the search, your results will appear below. The number of found proteins respecting your search criteria is indicated at the top (1) of your results table (2).

The screenshot shows the OpenProt search results for the *COL1A1* gene. The search criteria are set to Species: Homo sapiens, Assembly: GRCh38.p12 (GCA\_00001425.27), and Annotation: Ensembl+RefSeq (Ensembl | GRC). The search results table shows 99 proteins found, with the first six rows highlighted. The table columns include Protein Accession, Protein Types, Protein length (a.a.), kDa, pI, MS?, TE?, Domains?, Orthology Across 10 Species, Species, Gene, Transcript Accession, Type, and Localization?.

| Protein Accession?              | Protein Types? | Protein length (a.a.) | kDa    | pI   | MS?  | TE? | Domains? | Orthology Across 10 Species  | Species      | Gene   | Transcript Accession | Type | Localization? |
|---------------------------------|----------------|-----------------------|--------|------|------|-----|----------|------------------------------|--------------|--------|----------------------|------|---------------|
| 1 NP_000079.2 ENSP00000225964.5 | RefProt        | 1464                  | 138.91 | 5.47 | 2715 | 16  | 31       | 8: DR NMM RAN DM CE RT PT GA | Homo sapiens | COL1A1 | NM_000088.3          | mRNA | - details     |
| 2 XP_011522643.1                | RefProt        | 1398                  | 133.24 | 5.46 | 2602 | 0   | 29       | 8: DR NMM RAN DM CE RT PT GA | Homo sapiens | COL1A1 | ENST00000225964.9    | mRNA | - details     |
| 3 XP_005257115.2                | RefProt        | 1374                  | 130.85 | 5.31 | 2561 | 0   | 32       | 8: DR NMM RAN DM CE RT PT GA | Homo sapiens | COL1A1 | XM_011524341.1       | mRNA | - details     |
| 4 XP_005257116.2                | RefProt        | 1158                  | 112.09 | 5.13 | 2159 | 0   | 28       | 8: DR NMM RAN DM CE RT PT GA | Homo sapiens | COL1A1 | XM_005257058.4       | mRNA | - details     |
| 5 ENSP00000460459.1 I3L3H7      | RefProt        | 154                   | 16.35  | 5.35 | 142  | 0   | 8        | 0:                           | Homo sapiens | COL1A1 | ENST00000507689.1    | mRNA | - details     |
| 6 IP_257580                     | AltProt        | 209                   | 22.91  | 8.74 | 1    | 0   | 5        | 0:                           | Homo sapiens | COL1A1 | XM_005257059.4       | mRNA | 3'UTR details |

You can then refine your search results by playing with the options in the dropdown menu or by selecting the Advanced Search option.

1. Tick to search for or display only proteins (RefProts, AltProts and Isoforms) that **have been detected** by mass spectrometry (MS) and/or for which translation events (TE) have been identified in ribosome profiling studies.
2. Tick to search for or display only proteins that have been **detected by MS**. For a list of MS studies reanalysed by OpenProt, click [here](#).
3. Tick to search for or display only proteins that have been **detected by ribosome profiling**. For a list of ribosome profiling studies reanalysed by OpenProt, click [here](#).
4. Tick to search for or display only proteins **with predicted domains** by InterProScan.
5. Tick to search for or display **only AltProts**.
6. Tick to search for or display **only Isoforms**.

Any of the above can be combined as you wish. An advanced search is also available by clicking **Advanced Search**.



**General Filters**

Species:  Assembly:  Annotation:  Gene:  list of gene symbols Transcript:  Protein:

**Protein Filters**

Show only proteins with experimental evidence  Show only proteins detected by MS  Show only proteins detected by ribosome profiling studies  
 Show only proteins with predicted domains  Show only AltProts  Show only Isoforms

**Advanced Search** *(Hide additional filters)* ←

protein contains sequence:  type or localization:   
 reading frame:  Studies:

1. Filter by a specific **amino acid sequence**.
2. Filter according to the **transcript type** (mRNA or ncRNA) or the **localization** of AltORFs in transcripts. Within mRNAs, the localization of AltORFs is defined by the predicted start codon localization with respect to the annotated CDS start codon. The localization of AltORFs within non-coding RNAs is labeled "-". There are three possible choice of localizations of AltORFs within mRNAs: "5'UTR", "CDS", "3'UTR". Thus, the dropdown menu offers 5 choice: "5'UTR", "3'UTR", "CDS", "ncRNA", or "mRNA".
3. Filter AltORFs in a specific **reading frame** (+1, +2 or +3). The reading frame is determined with respect to the first nucleotide of each transcript (+1 reading frame).
4. Filter by dataset identifier. This is a dropdown menu containing all datasets currently in OpenProt. Select one to mine proteins detected in this dataset. *Please note that the filter supports only one study at a time.*

You can further sort your results by clicking on any option of the **Order by** dropdown menu (1).

**Genome**

Species:  Assembly:  Annotation:  Gene:  list of gene symbols Transcript:  Protein:

**Advanced Search** *(edit search criteria)*

Show only proteins with experimental evidence  Show only proteins detected by MS  Show only proteins detected by ribosome profiling studies  
 Show only proteins with predicted domains  Show only AltProts  Show only Isoforms

Search: 39 proteins found **1** Order by:  **2** Column Settings **3** download TSV **4** download FASTA **5** Share

| Protein Accession?            | Protein Types? | Protein length (a.a.) | kDa    | pI   | MS?  | TE? | Domains? #   Species Names? | Functional Prediction      |              |        |                 |      | Species | Gene | Transcript Accession | Type | Localization? |  |
|-------------------------------|----------------|-----------------------|--------|------|------|-----|-----------------------------|----------------------------|--------------|--------|-----------------|------|---------|------|----------------------|------|---------------|--|
|                               |                |                       |        |      |      |     |                             | DR                         | MM           | RN     | DM              | CE   |         |      |                      |      |               |  |
| 1 ENSP00000225964 NP_000079.2 | RefProt        | 1464                  | 138.91 | 5.47 | 1031 | 6   | 31                          | 8: DR MM RN DM CE BT PT OA | Homo sapiens | COL1A1 | ENST00000225964 | mRNA | -       |      | details              |      |               |  |
| 2 XP_011522643.1              | RefProt        | 1398                  | 133.24 | 5.46 | 991  | 0   | 29                          | 8: DR MM RN DM CE BT PT OA | Homo sapiens | COL1A1 | NM_000088.3     | mRNA | -       |      | details              |      |               |  |
| 3 XP_005257115.2              | RefProt        | 1374                  | 130.85 | 5.31 | 938  | 0   | 32                          | 8: DR MM RN DM CE BT PT OA | Homo sapiens | COL1A1 | XM_005257058.3  | mRNA | -       |      | details              |      |               |  |
| 4 XP_005257116.2              | RefProt        | 1158                  | 112.09 | 5.13 | 786  | 0   | 28                          | 8: DR MM RN DM CE BT PT OA | Homo sapiens | COL1A1 | XM_005257059.4  | mRNA | -       |      | details              |      |               |  |
| 5 ENSP00000460459 I3L3H7      | RefProt        | 154                   | 16.36  | 5.35 | 60   | 0   | 8                           | 1:                         | Homo sapiens | COL1A1 | ENST00000507689 | mRNA | -       |      | Contact us           |      |               |  |

1. The following **sorting options** are available:
  - “MS score (desc) / TE (desc) / Domains (desc)” *(by default)*;
  - “Domains (desc) / MS score (desc) / TE (desc)”;
  - “TE (desc) / MS score (desc) / Domains (desc)”;
  - “Molecular Weight (asc) / MS score (desc) / TE (desc) / Domains (desc)”;
  - “Molecular Weight (desc) / MS score (desc) / TE (desc) / Domains (desc)”;
  - “Protein Length (asc) / MS score (desc) / TE (desc) / Domains (desc)”;
  - “Protein Length (desc) / MS score (desc) / TE (desc) / Domains (desc)”.
2. Control which columns you want to see in the results table by clicking on the **Column Settings** and deselect any you don't want to see.
3. You can download your results table by clicking on **Download as TSV**. For more options and information on available downloads, click on [Downloads Guidelines](#).
4. You can download protein sequences from your results table by clicking on **Download as FASTA**. For more options and information on available downloads, click on [Downloads Guidelines](#).

You can also share your search by clicking on **Share**. A pop-up window will display a shareable link.

\*\*\* Getting started with the **data submission platform** in OpenProt \*\*\*

From any OpenProt page, including the home page, click **Submit study**.

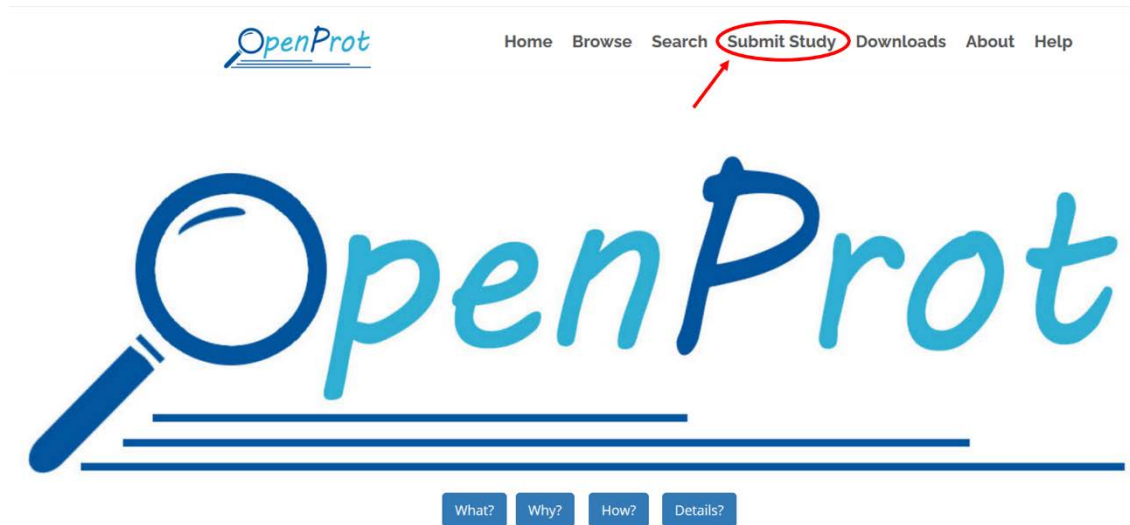

Once you clicked on Submit study, you should first select the type of file you are submitting: **mass spectrometry** or **ribosome profiling**.

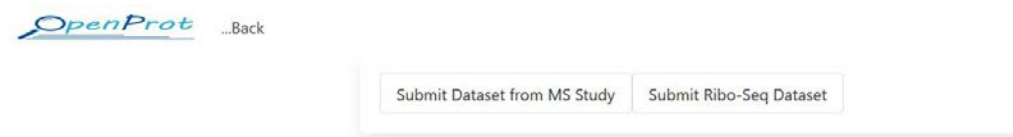

For **mass spectrometry studies**, your dataset has to be available in the [PRIDE Archive](#) with a public PXD accession.

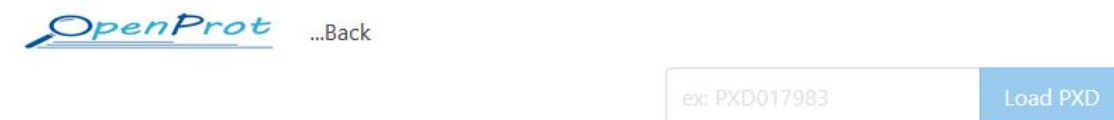

After entering the PXD accession number, the OpenProt submission platform will retrieve information from the PRIDE repository (here, we use the [PXD015644](#) as an example). Thus, the **PMID (1)** and **citation (2)** are automatically filled, as well as the available **samples** in the dataset **(3)**.

First, enter a **contact email** that will serve for all future correspondence **(1)**. For example, we will send you the results of the analysis at this email address.

OpenProt ...Back

## Study PXD015644

PMID: 31754102 1

Contact Email: profAdres@univ.org 1

Citation 2

Fang EF, Hou Y, Lautrup S, Jensen MB, Yang B, SenGupta T, Caponio D, Khezri R, Demarest TG, Aman Y, Figueroa D, Morevati M, Lee HJ, Kato H, Kassahun H, Lee JH, Filippelli D, Okur MN, Mangerich A, Croteau DL, Maezawa Y, Lyssiotis CA, Tao J, Yokote K, Rusten TE, Mattson MP, Jasper H, Nilsen H, Bohr VA. NAD+ augmentation restores mitophagy and limits accelerated aging in Werner syndrome. Nat Commun. 2019 10(1):5284

### Samples 3

Please enter a contact email

Group Selected Clear Selection Exclude Selection **Select All** 2

Add to Selected Group

|                           |                           |                           |                           |                           |                           |
|---------------------------|---------------------------|---------------------------|---------------------------|---------------------------|---------------------------|
| RB_160611_Henok_NC1_1.mgf | RB_160611_Henok_NC1_1.raw | RB_160611_Henok_NC1_2.mgf | RB_160611_Henok_NC1_2.raw | RB_160611_Henok_NC1_3.mgf | RB_160611_Henok_NC1_3.raw |
| RB_160611_Henok_NC1_4.mgf | RB_160611_Henok_NC1_4.raw | RB_160611_Henok_NC7_1.mgf | RB_160611_Henok_NC7_1.raw | RB_160611_Henok_NC7_2.mgf | RB_160611_Henok_NC7_2.raw |
| RB_160611_Henok_NC7_3.mgf | RB_160611_Henok_NC7_3.raw | RB_160611_Henok_NC7_4.mgf | RB_160611_Henok_NC7_4.raw | RB_160611_Henok_NN1_1.mgf | RB_160611_Henok_NN1_1.raw |
| RB_160611_Henok_NN1_2.mgf | RB_160611_Henok_NN1_2.raw | RB_160611_Henok_NN1_3.mgf | RB_160611_Henok_NN1_3.raw | RB_160611_Henok_NN1_4.mgf | RB_160611_Henok_NN1_4.raw |

Once you have entered your email address, you can start **selecting samples (2)**.

In order to select a sample, click on its name. The blue color indicates the sample is selected **(1)**, the white background indicates the sample is not selected **(2)**.

### Samples

All samples must be grouped before submit

Group Selected 1 Clear Selection 2 Exclude Selection 3 Select All 4

Add to Selected Group 5

|                           |                                                                                                             |                           |                           |                           |                                                                                                             |
|---------------------------|-------------------------------------------------------------------------------------------------------------|---------------------------|---------------------------|---------------------------|-------------------------------------------------------------------------------------------------------------|
| RB_160611_Henok_NC1_1.mgf | RB_160611_Henok_NC1_1.raw <span style="border: 1px solid green; border-radius: 50%; padding: 2px;">1</span> | RB_160611_Henok_NC1_2.mgf | RB_160611_Henok_NC1_2.raw | RB_160611_Henok_NC1_3.mgf | RB_160611_Henok_NC1_3.raw <span style="border: 1px solid green; border-radius: 50%; padding: 2px;">2</span> |
| RB_160611_Henok_NC1_4.mgf | RB_160611_Henok_NC1_4.raw                                                                                   | RB_160611_Henok_NC7_1.mgf | RB_160611_Henok_NC7_1.raw | RB_160611_Henok_NC7_2.mgf | RB_160611_Henok_NC7_2.raw                                                                                   |
| RB_160611_Henok_NC7_3.mgf | RB_160611_Henok_NC7_3.raw                                                                                   | RB_160611_Henok_NC7_4.mgf | RB_160611_Henok_NC7_4.raw | RB_160611_Henok_NN1_1.mgf | RB_160611_Henok_NN1_1.raw                                                                                   |
| RB_160611_Henok_NN1_2.mgf | RB_160611_Henok_NN1_2.raw                                                                                   | RB_160611_Henok_NN1_3.mgf | RB_160611_Henok_NN1_3.raw | RB_160611_Henok_NN1_4.mgf | RB_160611_Henok_NN1_4.raw                                                                                   |
| RB_160611_Henok_NN7_1.mgf | RB_160611_Henok_NN7_1.raw                                                                                   | RB_160611_Henok_NN7_2.mgf | RB_160611_Henok_NN7_2.raw | RB_160611_Henok_NN7_3.mgf | RB_160611_Henok_NN7_3.raw                                                                                   |
| RB_160611_Henok_NN7_4.mgf | RB_160611_Henok_NN7_4.raw                                                                                   | RB_160611_Henok_WC1_1.mgf | RB_160611_Henok_WC1_1.raw | RB_160611_Henok_WC1_2.mgf | RB_160611_Henok_WC1_2.raw                                                                                   |
| RB_160611_Henok_WC1_3.mgf | RB_160611_Henok_WC1_3.raw                                                                                   | RB_160611_Henok_WC1_4.mgf | RB_160611_Henok_WC1_4.raw | RB_160611_Henok_WC7_1.mgf | RB_160611_Henok_WC7_1.raw                                                                                   |
| RB_160611_Henok_WC7_2.mgf | RB_160611_Henok_WC7_2.raw                                                                                   | RB_160611_Henok_WC7_3.mgf | RB_160611_Henok_WC7_3.raw | RB_160611_Henok_WC7_4.mgf | RB_160611_Henok_WC7_4.raw                                                                                   |
| RB_160611_Henok_WN1_1.mgf | RB_160611_Henok_WN1_1.raw                                                                                   | RB_160611_Henok_WN1_2.mgf | RB_160611_Henok_WN1_2.raw | RB_160611_Henok_WN1_3.mgf | RB_160611_Henok_WN1_3.raw                                                                                   |
| RB_160611_Henok_WN1_4.mgf | RB_160611_Henok_WN1_4.raw                                                                                   | RB_160611_Henok_WN7_1.mgf | RB_160611_Henok_WN7_1.raw | RB_160611_Henok_WN7_2.mgf | RB_160611_Henok_WN7_2.raw                                                                                   |
| RB_160611_Henok_WN7_3.mgf | RB_160611_Henok_WN7_3.raw                                                                                   | RB_160611_Henok_WN7_4.mgf | RB_160611_Henok_WN7_4.raw |                           |                                                                                                             |

Once samples are selected, you can click on **“Group selected” (1)** to add each of them to on group with identical parameters. To correct erroneous selection, you can click on **“clear selection” (2)**. If the datasets contain some samples that you don’t want to include in the analysis, you can click on **“Exclude selection” (3)**. If you want to select all samples at once, you can click on **“select all” (4)**. Once samples are grouped, they will be removed from the selection panel. If you forgot one sample, you can add it to a pre-formed group by clicking on **“add to selected group” (5)**. *Please not that all samples must be grouped in order to submit.*

Your grouped samples will then appear in the parameters editing box (1). Please note that your samples should be grouped by parameter settings.

| Samples                          | Enzymes    | Modifications               |
|----------------------------------|------------|-----------------------------|
| Sample group not ready to submit |            |                             |
| RB_160611_Henok_NC1_1.raw        | Add Enzyme | Edit Variable Modifications |
| RB_160611_Henok_NC1_2.raw        |            |                             |
| RB_160611_Henok_NC1_3.raw        |            | Edit Fixed Modifications    |
| RB_160611_Henok_NC1_4.raw        |            |                             |
| RB_160611_Henok_NC7_1.raw        |            |                             |

For each sample within a group, you can edit its fraction and replicate number by clicking on “**Edit**” (1). Then, for each group you have to indicate the **enzyme** (2) used for protein digestion, and the **variable** (3) and **fixed modifications** (4) to include in the analysis. These are drop-down menus with all available enzyme and modification in our pipeline. For custom enzyme or modifications, please [contact us](#).

| Samples                          | Enzymes                               | Modifications                 |
|----------------------------------|---------------------------------------|-------------------------------|
| Sample group not ready to submit |                                       |                               |
| RB_160611_Henok_NC1_1.raw        | Trypsin (no P rule); Cleaves after RK | Acetylation of protein N-term |
| RB_160611_Henok_NC1_2.raw        |                                       |                               |
| RB_160611_Henok_NC1_3.raw        |                                       | Carbamidomethylation of C     |
| RB_160611_Henok_NC1_4.raw        |                                       |                               |
| RB_160611_Henok_NC7_1.raw        |                                       |                               |

The parameters entered can always be changed by clicking the cross next to the selected enzyme or modification.

At the bottom of the page, the next parameters to enter are the **species** (1), the **type of biological sample** (2), the **fragmentation** protocol (3) and the **mass spectrometer** used (4).

|         |             |               |               |
|---------|-------------|---------------|---------------|
| Species | Sample Type | Fragmentation | MS Instrument |
| 1       | 2           | 3             | 4             |

The species, fragmentation and MS instrument are compulsory for submission. The MS instrument is retrieved from the PRIDE directory. The species is a dropdown menu containing all species currently supported by OpenProt. The fragmentation protocol is a dropdown menu with the protocols currently supported by OpenProt. (For more information on the fragmentation protocol, click [here](#)).

Once all compulsory parameters have been filled, you can click on submit. You will received an email (at the email address indicated at the top of the form) to confirm the submission (please check your spam folder if you don't receive any email).

For **ribosome profiling studies**, your dataset has to be available in the [Gene Omnibus Archive](#) with a public GSE accession.

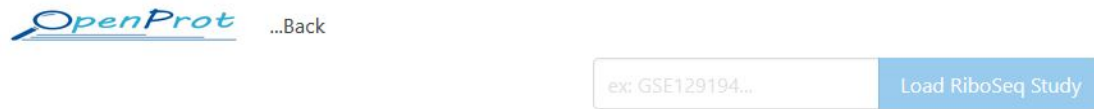

After entering the GSE accession number, the OpenProt submission platform will retrieve information from the Gene Omnibus repository (here, we use the [GSE144682](#) as an example). Thus, the **PMID** (1) and **citation** (2) are automatically filled, as well as the available **samples** in the dataset (3).

First, enter a **contact email** that will serve for all future correspondence (1). For example, we will send you the results of the analysis at this email address.

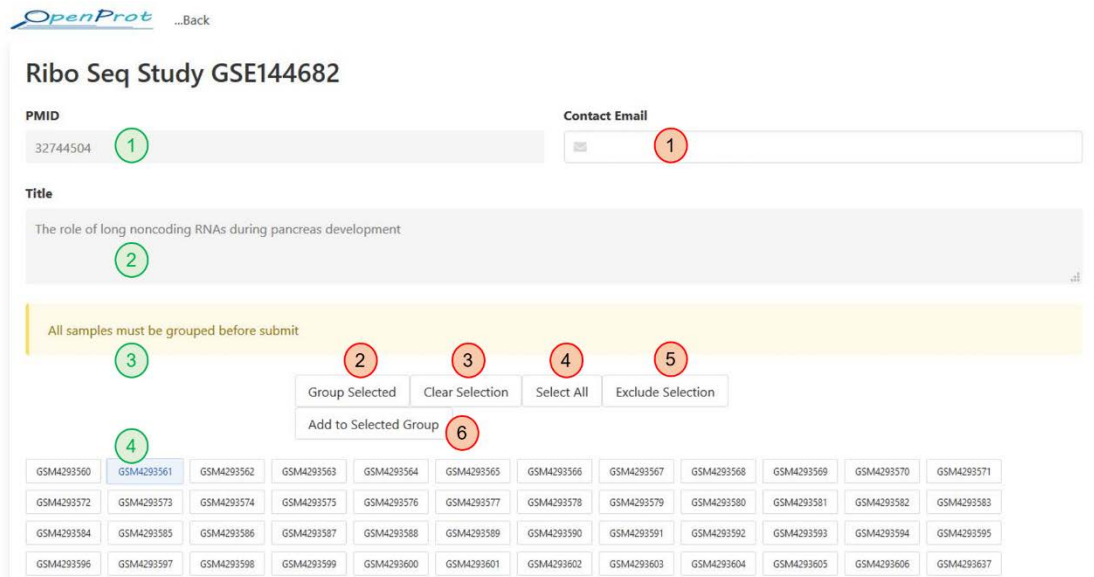

Once you have entered your email address, you can start **selecting samples**.

In order to select a sample, click on its name. The blue color indicates the sample is selected (4), the white background indicates the sample is not selected.

Once samples are selected, you can click on “**Group selected**” (2) to add each of them to on group with identical parameters. To correct erroneous selection, you can click on “**clear selection**” (3). If you want to select all samples at once, you can click on “**select all**” (4). If the datasets contain some samples that you don’t want to include in the analysis, you can click on “**Exclude selection**” (5). Once samples are grouped, they will be removed from the selection panel. If you forgot one sample, you can add it to a pre-formed group by clicking on “**add to selected group**” (6). *Please not that all samples must be grouped in order to submit.*

Your grouped samples will then appear in the parameters editing box (1). Please note that your samples should be grouped by parameter settings.

A sample can always be removed from the group by clicking the cross next to its name.

At the bottom of the page, the next parameters to enter are the **species (1)**, the **time of treatment (2)**, the **drug used (3)** and the **biological type of the sample (4)**.

The species, time of treatment and drug used are compulsory for submission. The species is a dropdown menu containing all species currently supported by OpenProt. The time of treatment should correspond to when the drug was added during the protocol (if the drug was part of the lysis buffer, select n/a). The drug used is a dropdown menu containing all drugs currently supported by OpenProt.

Once all compulsory parameters have been filled, you can click on submit. You will received an email (at the email address indicated at the top of the form) to confirm the submission (please check your spam folder if you don't receive any email).

\*\*\* Getting started with the **downloads platform** in OpenProt \*\*\*

From any OpenProt page, including the home page, click **Downloads**.

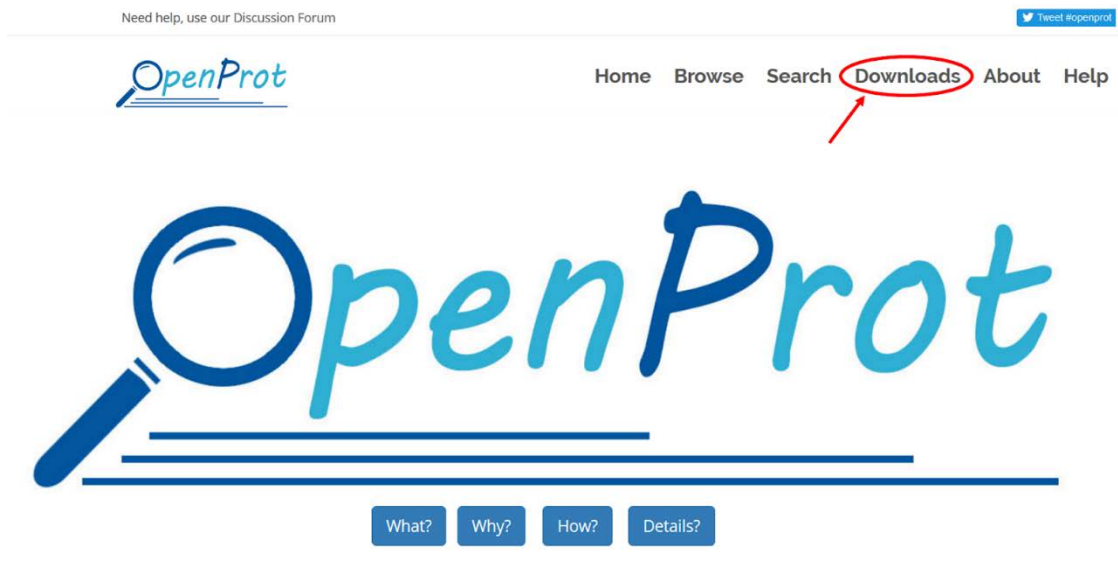

Once you clicked on Downloads, you should first select an **OpenProt release**. The most recent is the default option.

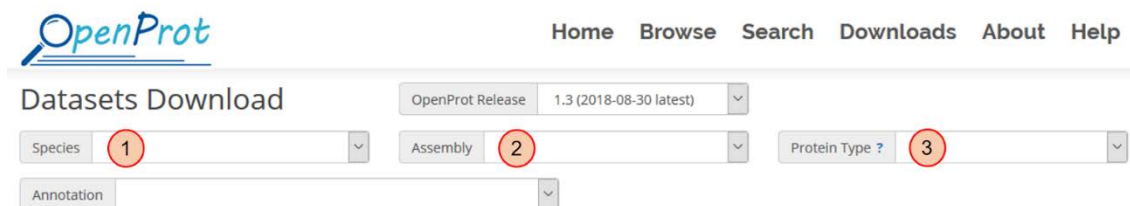

You can then tune the database you would like to download:

1. Select a **species**. Available species so far are: *Homo sapiens*, *Mus musculus*, *Rattus norvegicus*, *Pan troglodytes*, *Danio rerio*, *Drosophila melanogaster*, *Caenorhabditis elegans*, *Bos taurus*, *Saccharomyces cerevisiae S288c*, and *Ovis aries*.
2. Select an **assembly**. The most recent for each species is input by default upon species selection.
3. Select the desired **protein type**. You can choose whether you would like to download RefProts only, or AltProts and Isoforms only, or if you would like to download all, RefProts, AltProts and Isoforms.

Once you have selected the protein type you desire, a result table will already appear, but you can refine it further.



OpenProt Home Browse Search Downloads About Help

Datasets Download OpenProt Release 1.3 (2018-08-30 latest)

Species: Homo sapiens Assembly: GRCh38.p5 (GCA\_000001405.20) Protein Type ? AltProts and Isoforms

Annotation: **1** Supporting Evidence ? **2**

| <b>1</b> Annotation                  | Supporting Evidence                        | RefProts Included | File                                                                                              | File Type <b>2</b> | Readme <b>3</b>        |
|--------------------------------------|--------------------------------------------|-------------------|---------------------------------------------------------------------------------------------------|--------------------|------------------------|
| Ensembl,RefSeq (GRCh38.83,GRCh38.p7) | Detected with at least two unique peptides | No                | <a href="#">human-openprot-r1_3-altprots+isoforms_min_2_pep-grch38.83+grch38.p7.tsv.zip</a>       | TSV (Protein)      | <a href="#">readme</a> |
|                                      |                                            |                   | <a href="#">human-openprot-r1_3-altprots+isoforms_min_2_pep-grch38.83+grch38.p7.fasta.zip</a>     | Fasta (Protein)    | <a href="#">readme</a> |
|                                      |                                            |                   | <a href="#">human-openprot-r1_3-altprots+isoforms_min_2_pep-grch38.83+grch38.p7.bed.zip</a>       | BED                | <a href="#">readme</a> |
|                                      |                                            |                   | <a href="#">human-openprot-r1_3-altprots+isoforms_min_2_pep-grch38.83+grch38.p7.dna.fasta.zip</a> | Fasta (DNA)        | <a href="#">readme</a> |
|                                      | Detected with at least one unique peptide  | No                | <a href="#">human-openprot-r1_3-altprots+isoforms_min_1_pep-grch38.83+grch38.p7.tsv.zip</a>       | TSV (Protein)      | <a href="#">readme</a> |
|                                      |                                            |                   | <a href="#">human-openprot-r1_3-altprots+isoforms_min_1_pep-grch38.83+grch38.p7.fasta.zip</a>     | Fasta (Protein)    | <a href="#">readme</a> |
|                                      |                                            |                   | <a href="#">human-openprot-r1_3-altprots+isoforms_min_1_pep-grch38.83+grch38.p7.bed.zip</a>       | BED                | <a href="#">readme</a> |
|                                      |                                            |                   | <a href="#">human-openprot-r1_3-altprots+isoforms_min_1_pep-grch38.83+grch38.p7.dna.fasta.zip</a> | Fasta (DNA)        | <a href="#">readme</a> |
|                                      | All predicted                              | No                | <a href="#">human-openprot-r1_3-altprots+isoforms-grch38.83+grch38.p7.tsv.zip</a>                 | TSV (Protein)      | <a href="#">readme</a> |
|                                      |                                            |                   | <a href="#">human-openprot-r1_3-altprots+isoforms-grch38.83+grch38.p7.fasta.zip</a>               | Fasta (Protein)    | <a href="#">readme</a> |

1. Select an **annotation**. OpenProt supports both Ensembl and NCBI RefSeq annotations for all species. If you would like to have more information on supported annotations, please click [here](#).
2. Select the desired level of **supporting evidence**. You will be given this choice if you chose as protein type one that includes AltProts and Isoforms. You have 3 options: “*all predicted*”, “*detected with at least one unique peptide*”, or “*detected with at least two unique peptides*”. This choice refers to the level of supporting MS evidence annotated in OpenProt database. If you are unsure which database would suit you best, you can read more [here](#) for recommendations on which one to choose.

The table of results from your download query are grouped on a table. The first column **(1)** indicates the annotation used, and the next two refers to your search criteria regarding supporting evidence and the protein type. Several file types are available for download **(2)** - TSV, FASTA (protein), FASTA (DNA), or BED). Finally, each file is accompanied by a readme that regroups all information needed to understand it **(3)**: headers, parse rules and file naming scheme.

Once you have selected the file you wish to download, a pop-up table containing the **downloadable file** becomes visible. You can **download** the database by clicking on its name, or from the read me pop-up.

Need help, use our Discussion Forum Tweet #openprot

# human-openprot-r1\_3-altprots+isoforms\_min\_2\_pep-grch38.83+grch38.p7.fasta.zip

## OpenProt database

OpenProt release 1.3 - August 30 2018

OpenProt enables improved mapping of the proteome. In addition to currently annotated CDSs and proteins, OpenProt displays the sequence, functional annotation and expression evidence of previously hidden alternative ORFs (AltORFs) and their corresponding alternative proteins (AltProts).

- File: human-openprot-r1\_3-altprots+isoforms\_min\_2\_pep-grch38.83+grch38.p7.fasta
- Species: Homo sapiens
- Annotation: GRCh38.83,GRCh38.p7
- This file contains AltProts and Isoforms for which at least 2 unique peptides has been detected by MS.
- File type: Fasta (Protein)

### Protein FASTA Sequence Header Lines

General format:

```
>Identifier|TX=TaxonomyIdentifier OS=OrganismName GN=GeneName TA= TranscriptAccession PA=ProteinAccession
```

[Back to download selection wizard \(to download FASTA files for other species\)](#) [Download The File](#)

|                |    |                                                                                                            |                 |        |
|----------------|----|------------------------------------------------------------------------------------------------------------|-----------------|--------|
| unique peptide |    | grch38.83+grch38.p7.fasta.zip                                                                              |                 |        |
|                |    | <a href="#">Download</a> human-openprot-r1_3-altprots+isoforms_min_1_pep-grch38.83+grch38.p7.bed.zip       | BED             | readme |
|                |    | <a href="#">Download</a> human-openprot-r1_3-altprots+isoforms_min_1_pep-grch38.83+grch38.p7.dna.fasta.zip | Fasta (DNA)     | readme |
| All predicted  | No | <a href="#">Download</a> human-openprot-r1_3-altprots+isoforms-grch38.83+grch38.p7.tsv.zip                 | TSV (Protein)   | readme |
|                |    | <a href="#">Download</a> human-openprot-r1_3-altprots+isoforms-grch38.83+grch38.p7.fasta.zip               | Fasta (Protein) | readme |

[Back to the table of contents](#)
